# Supplementary material for: Multiomic Strategies Reveal Diversity and Important Functional Aspects of Human Gut Microbiome
Source: Hindawi journal article supplement (doi:10.1155/2018/6074918), 2018-11-14
Supplement: f1 [file 6074918.f1.pdf]

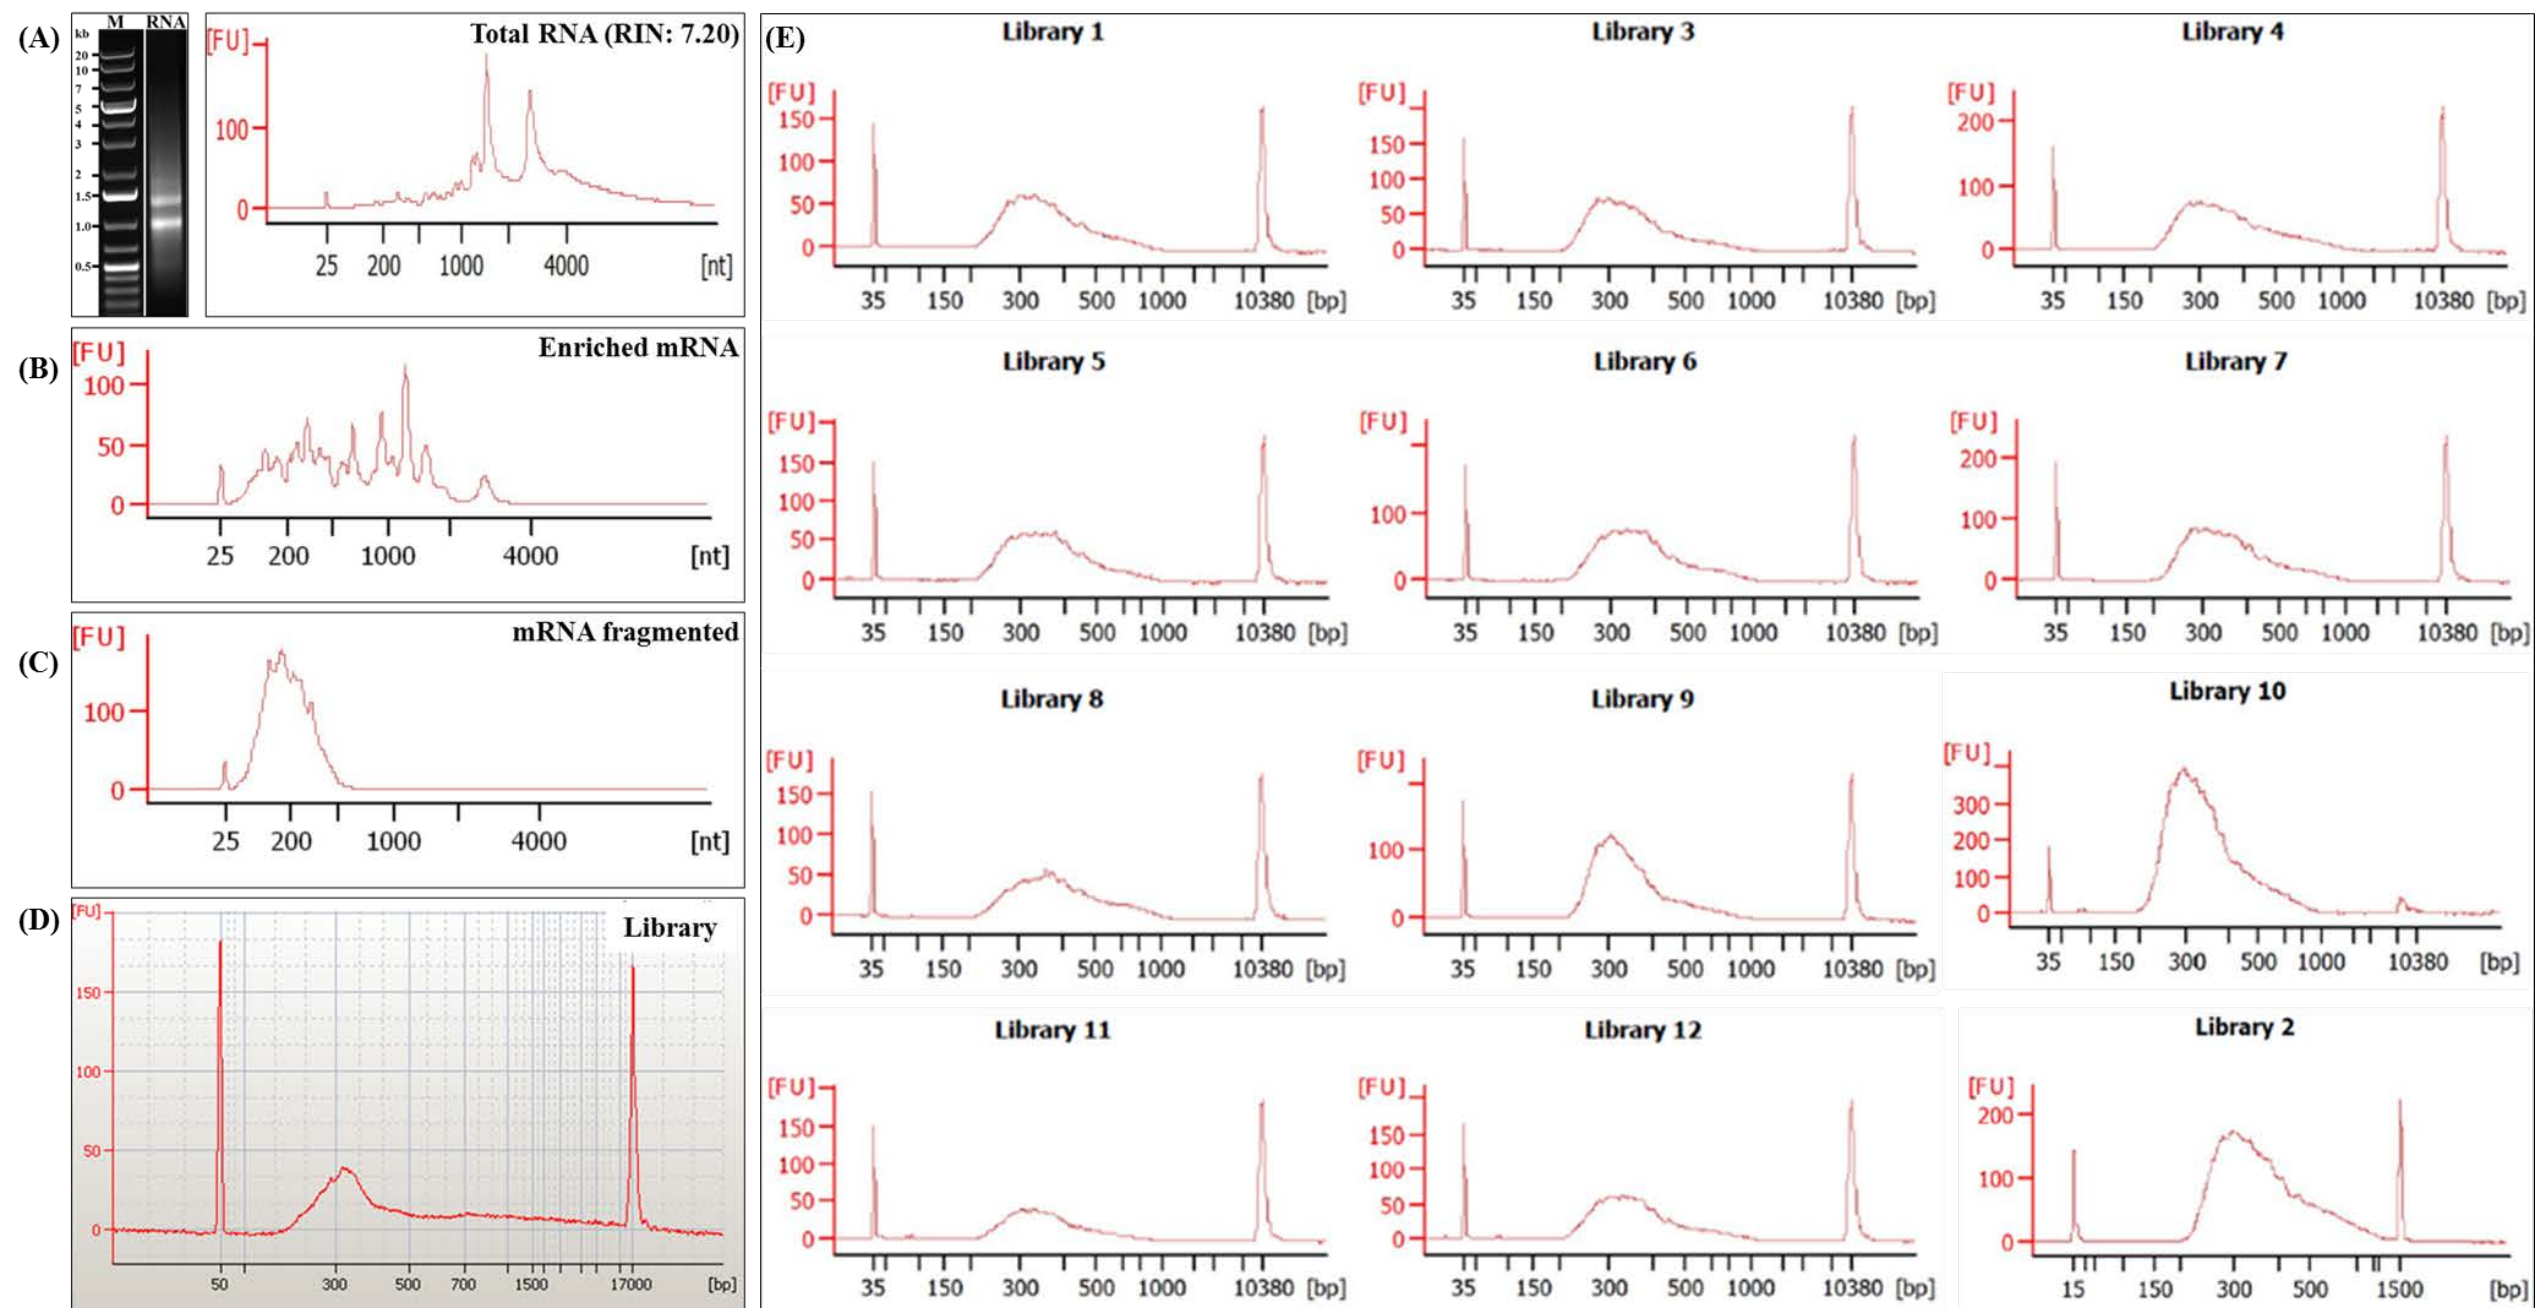

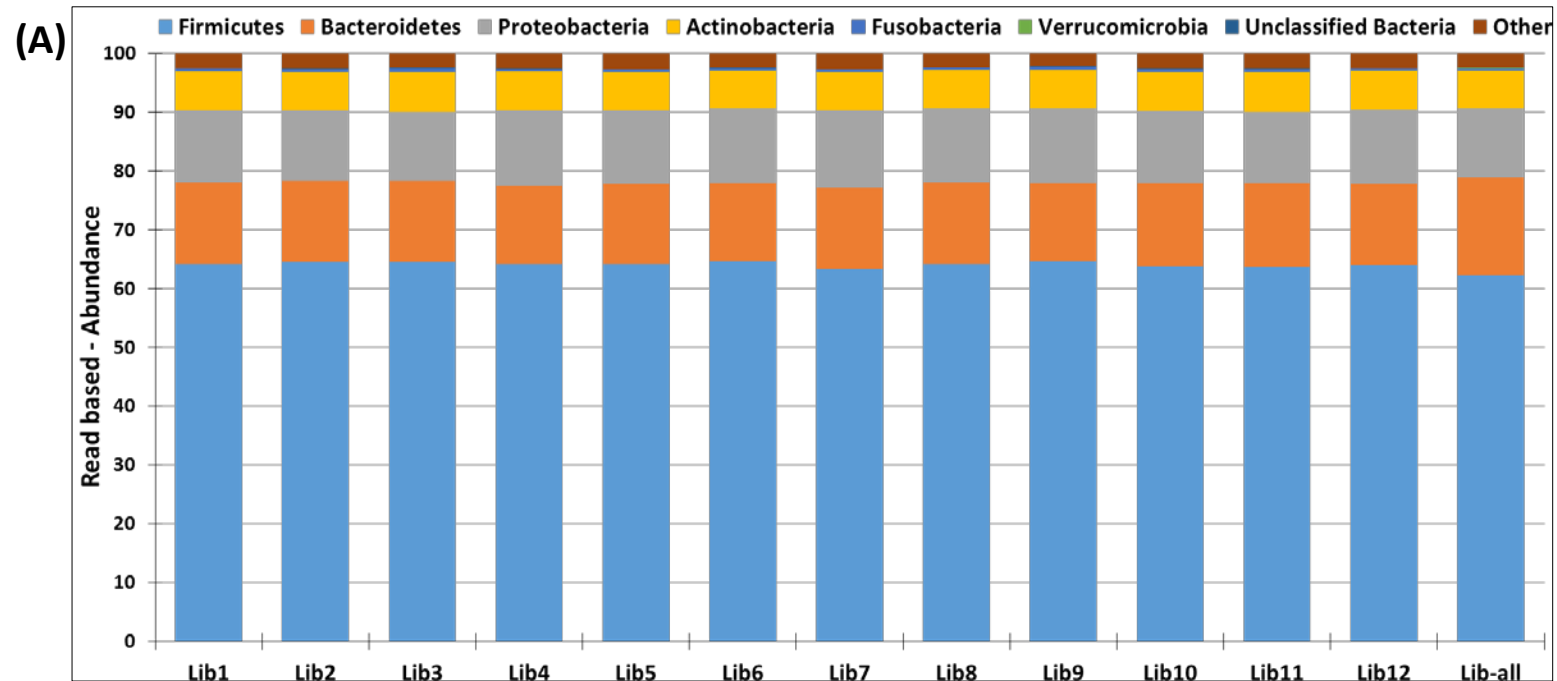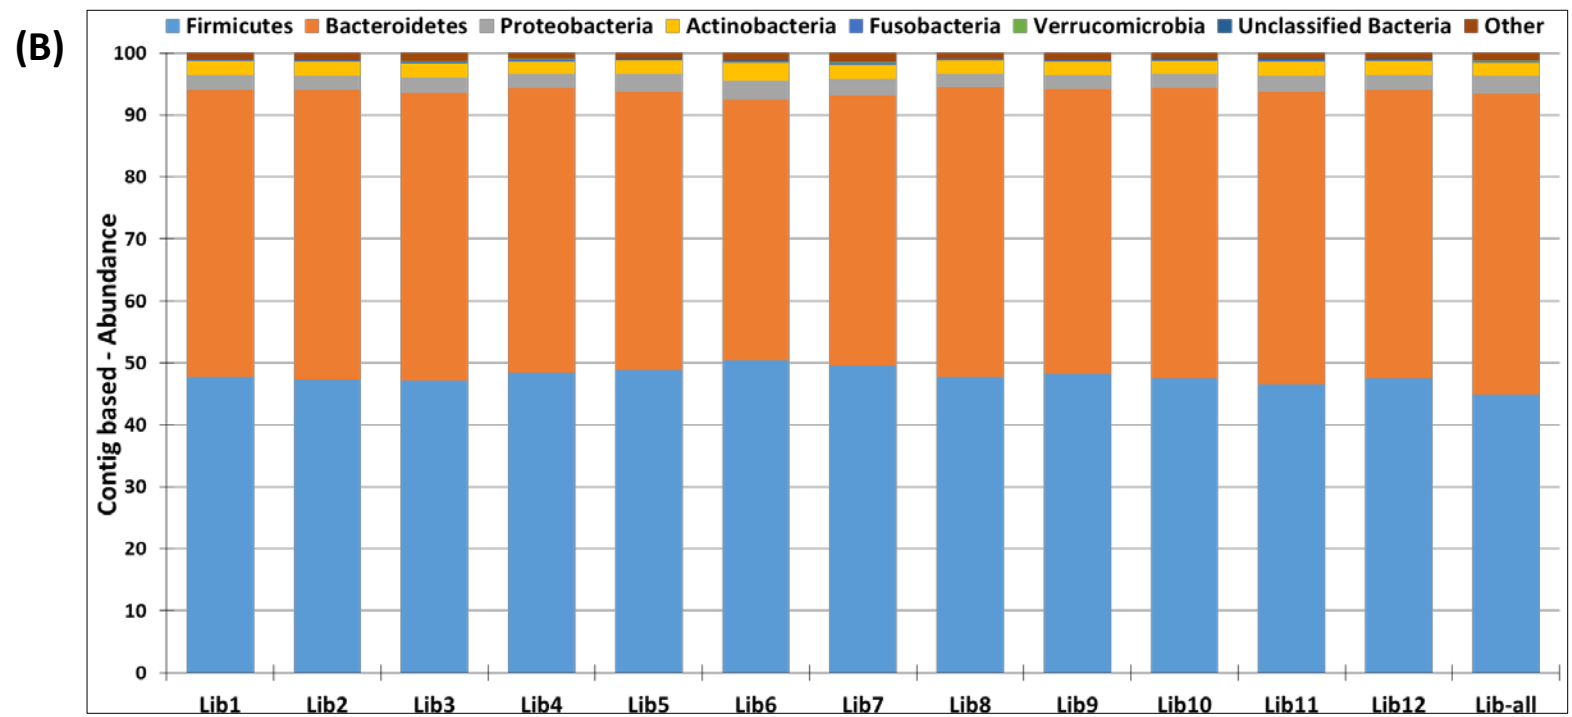

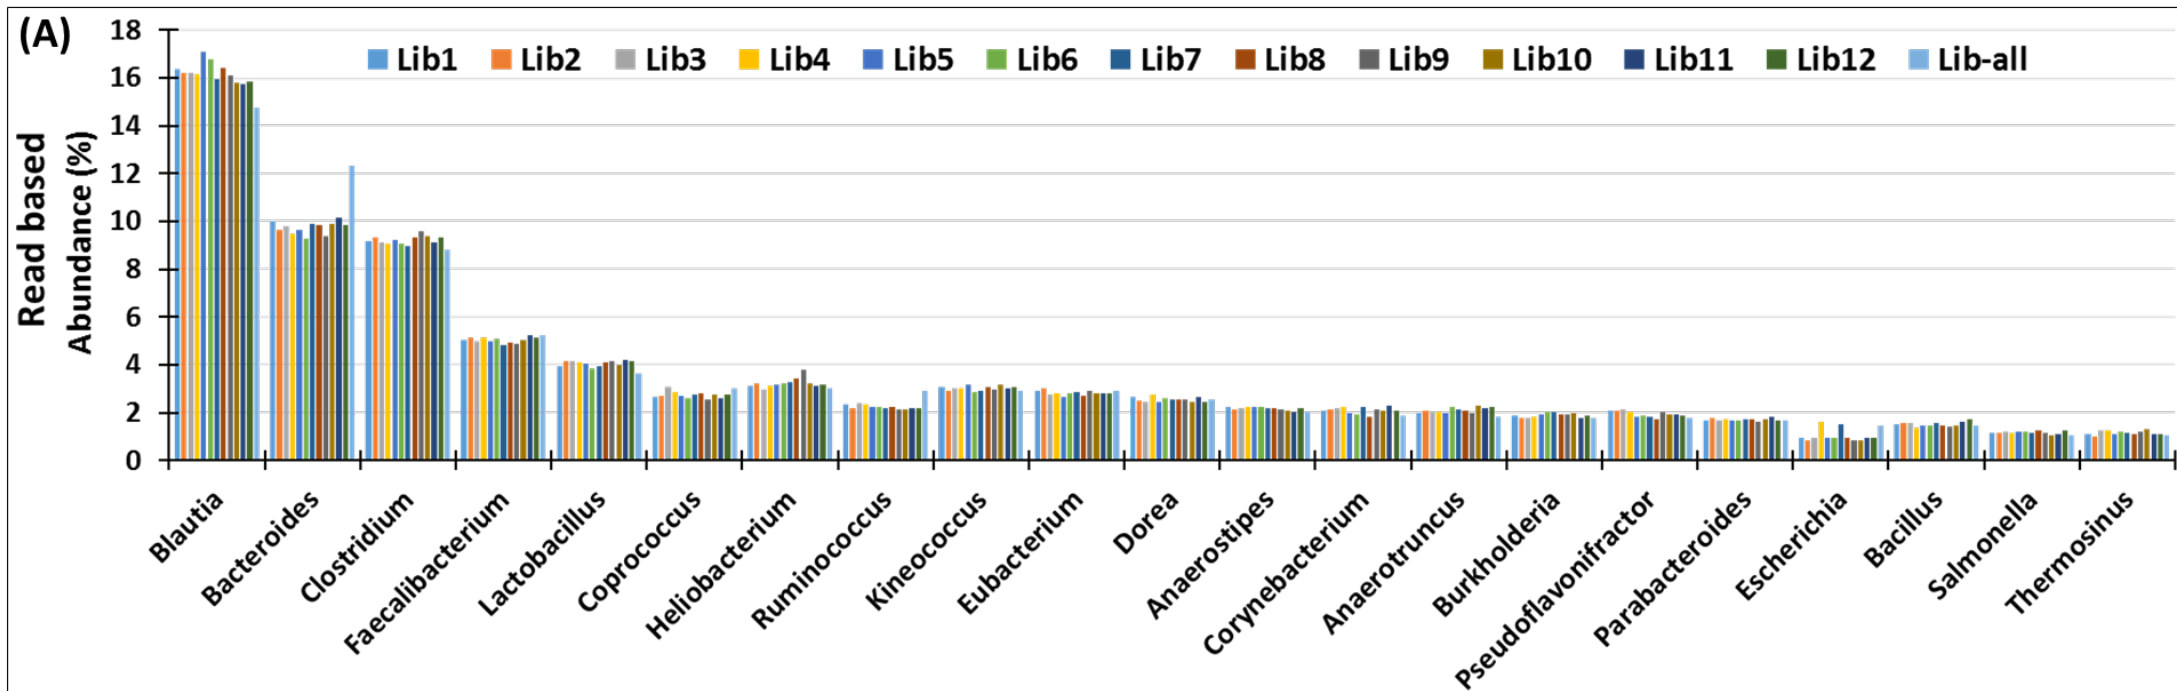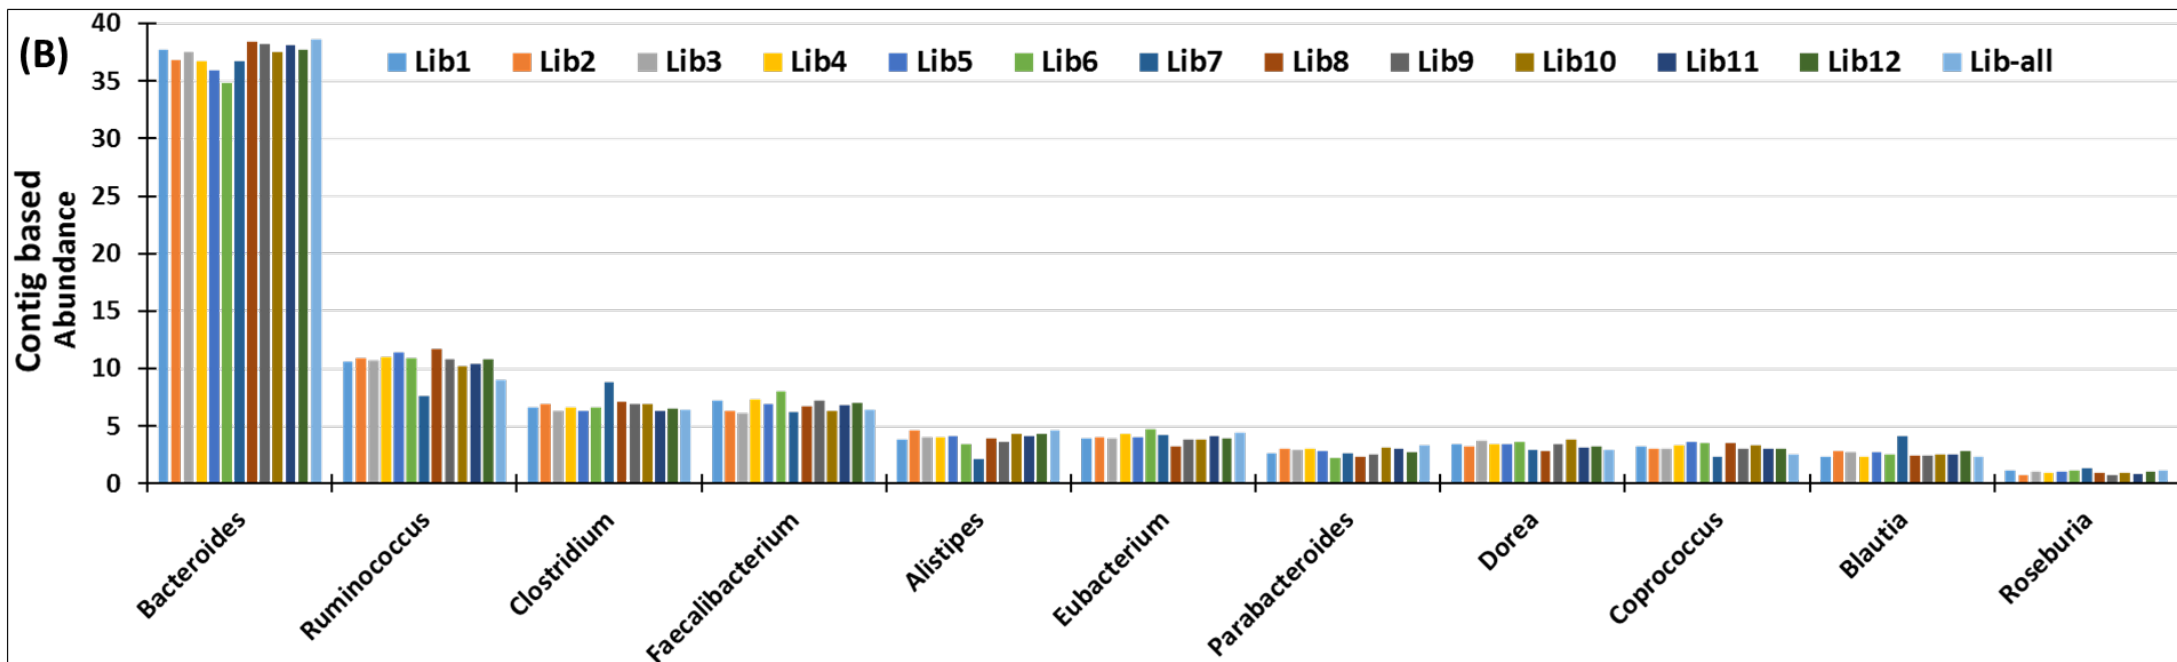

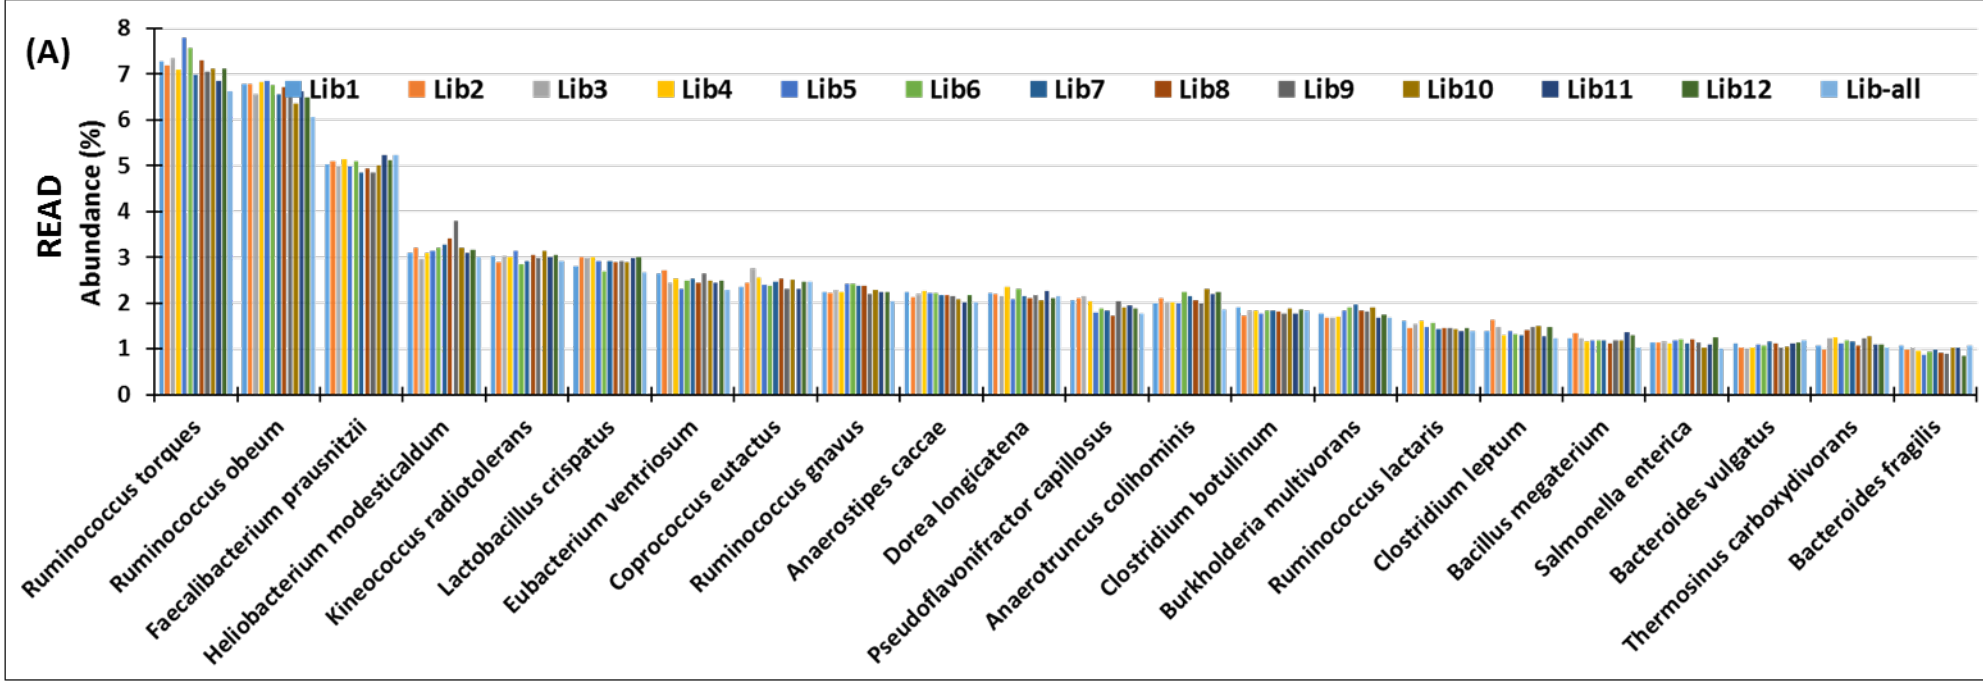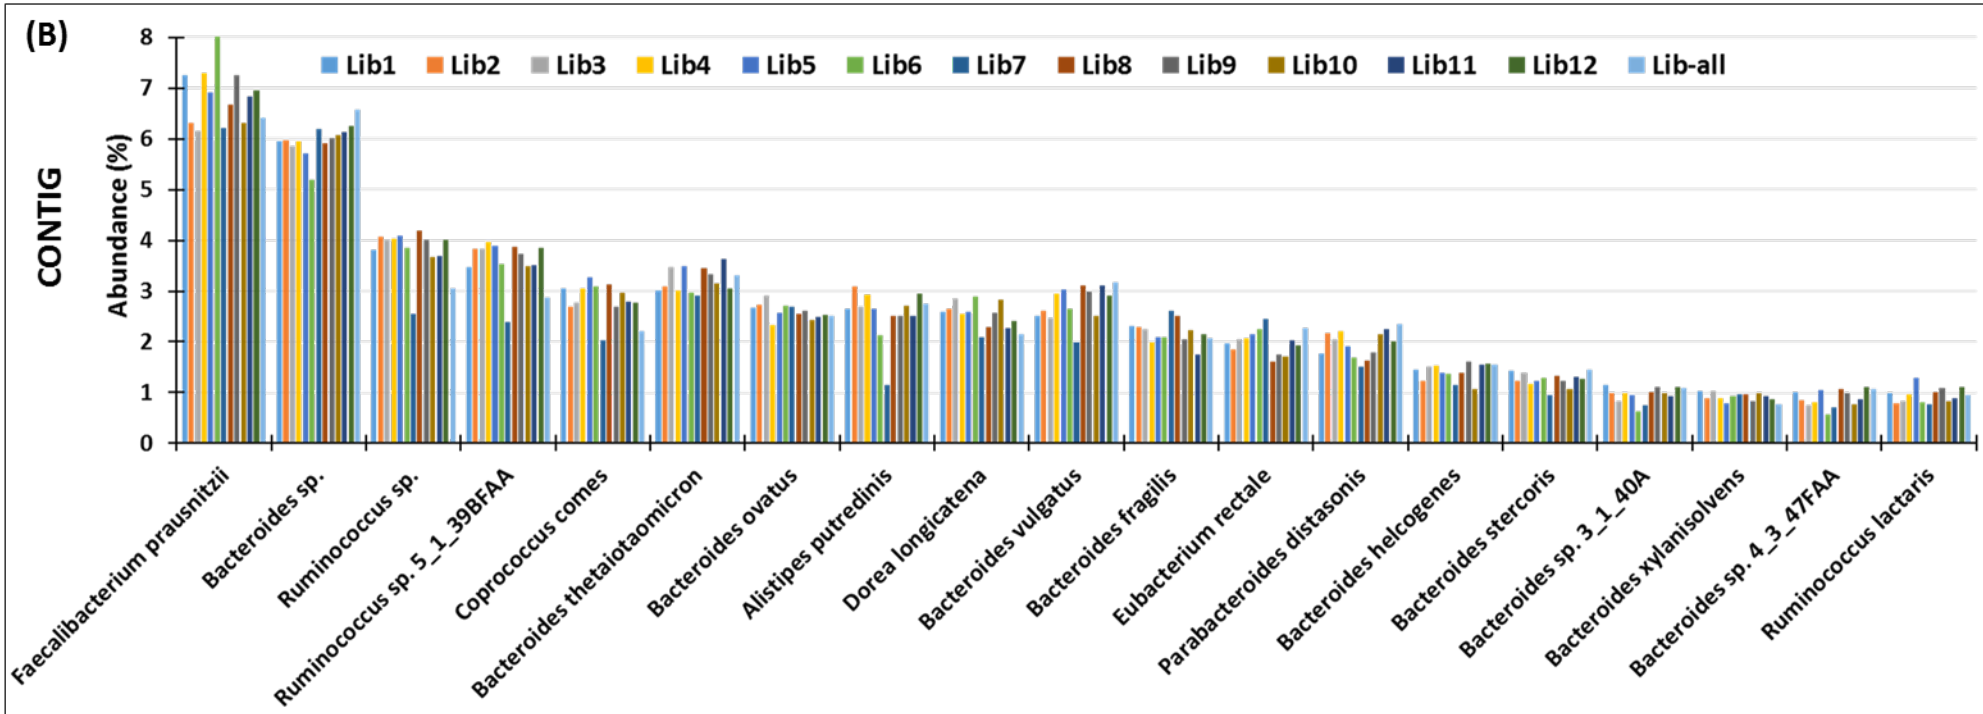

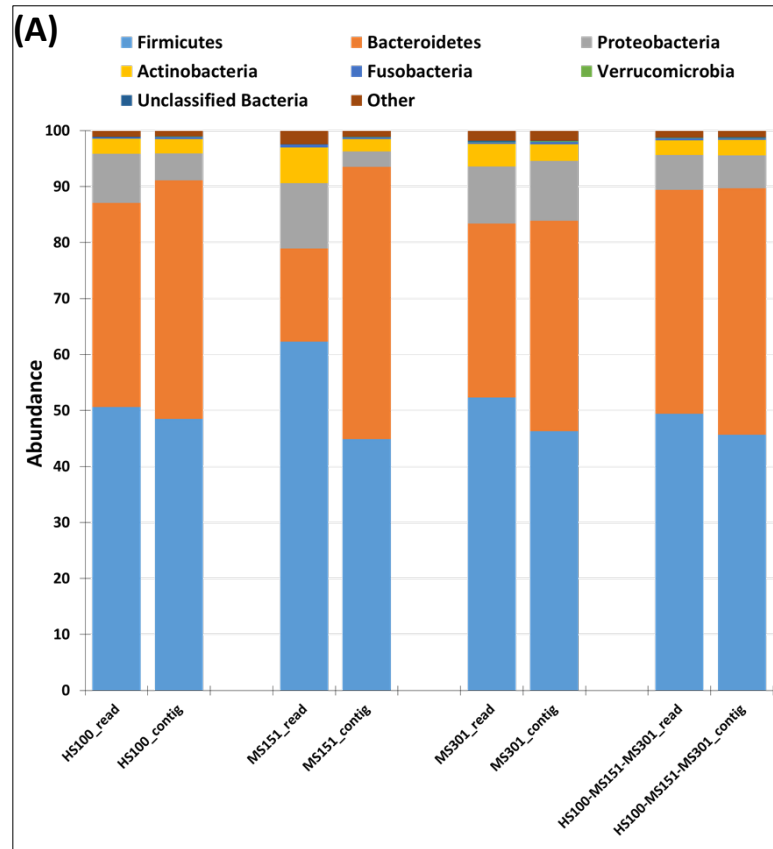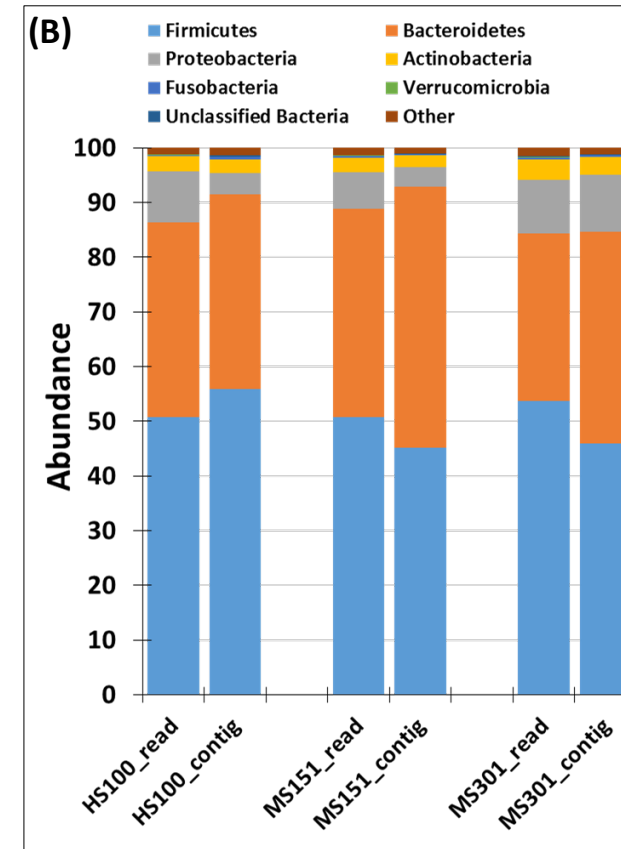

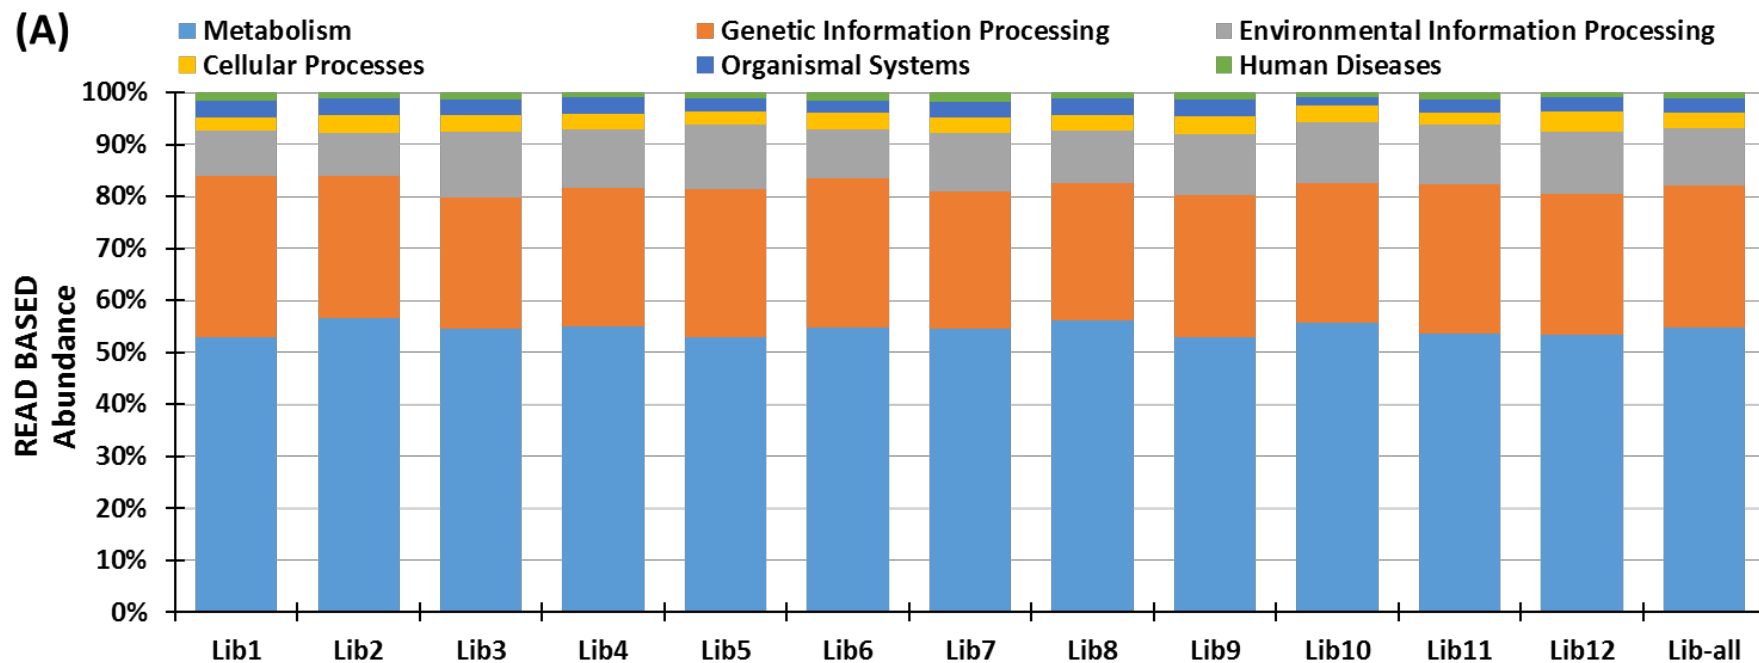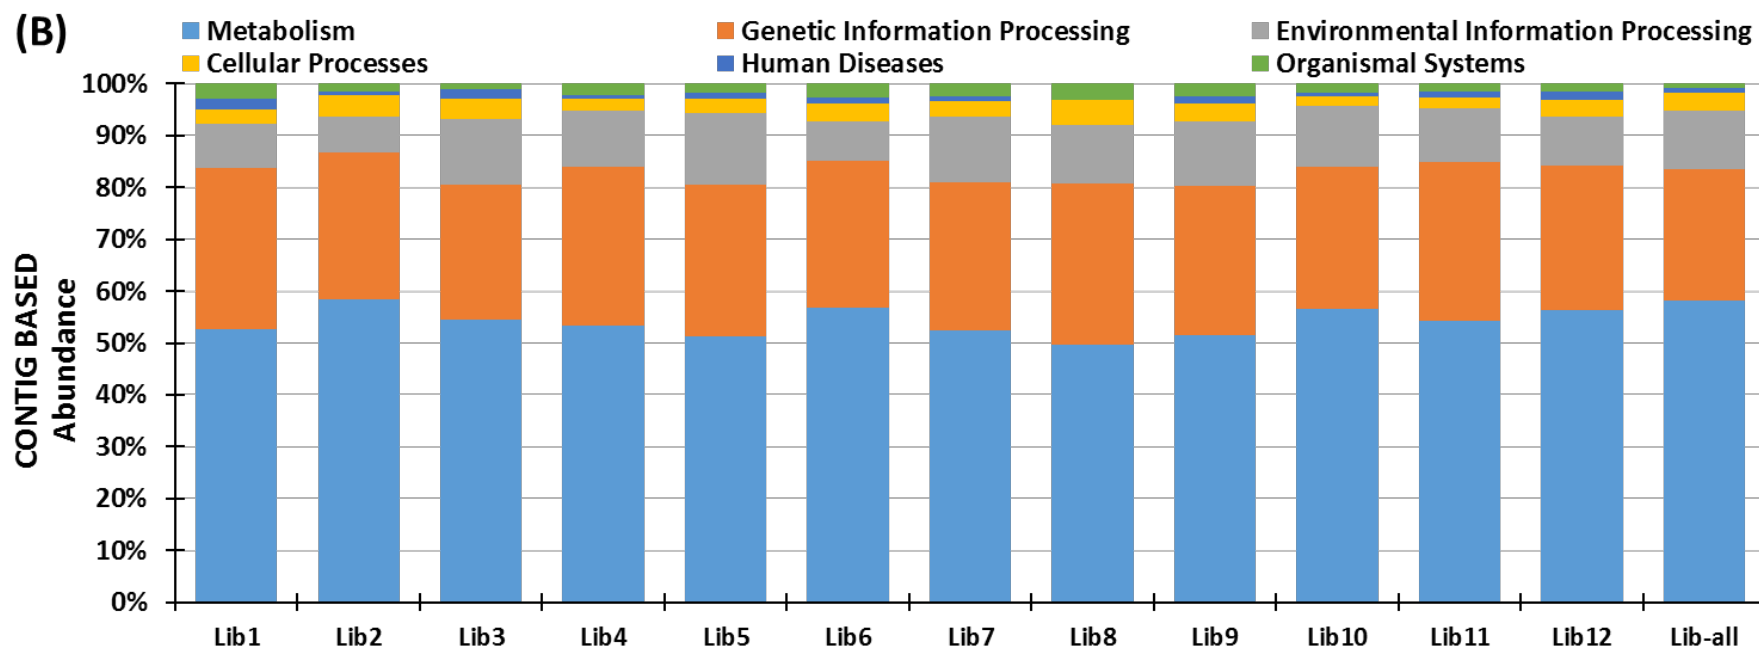

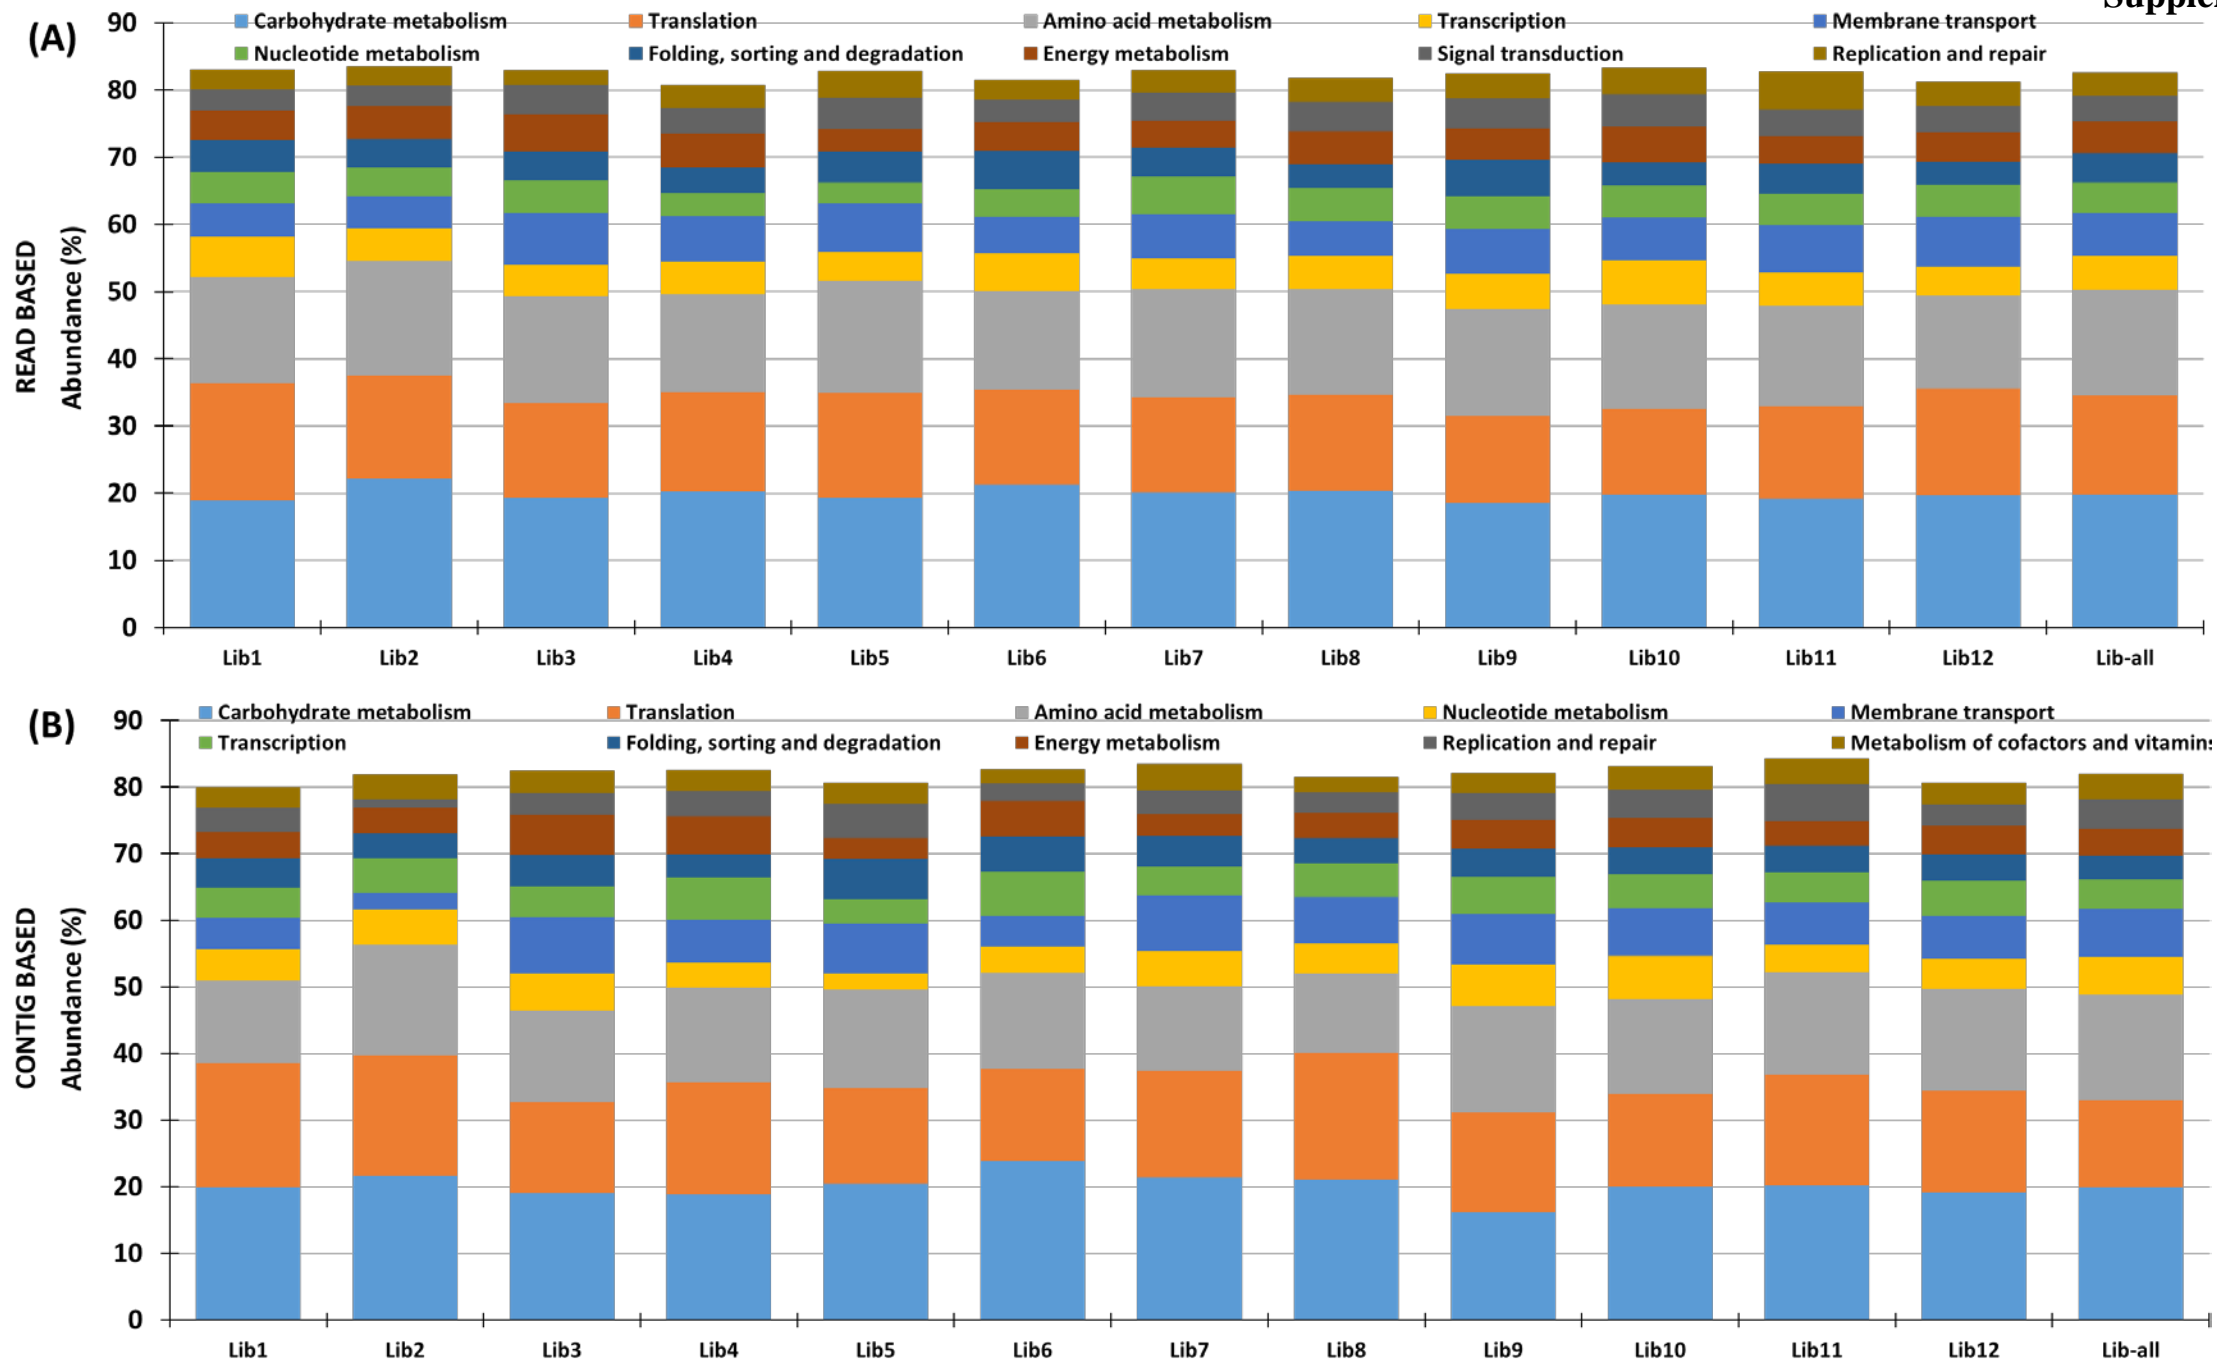

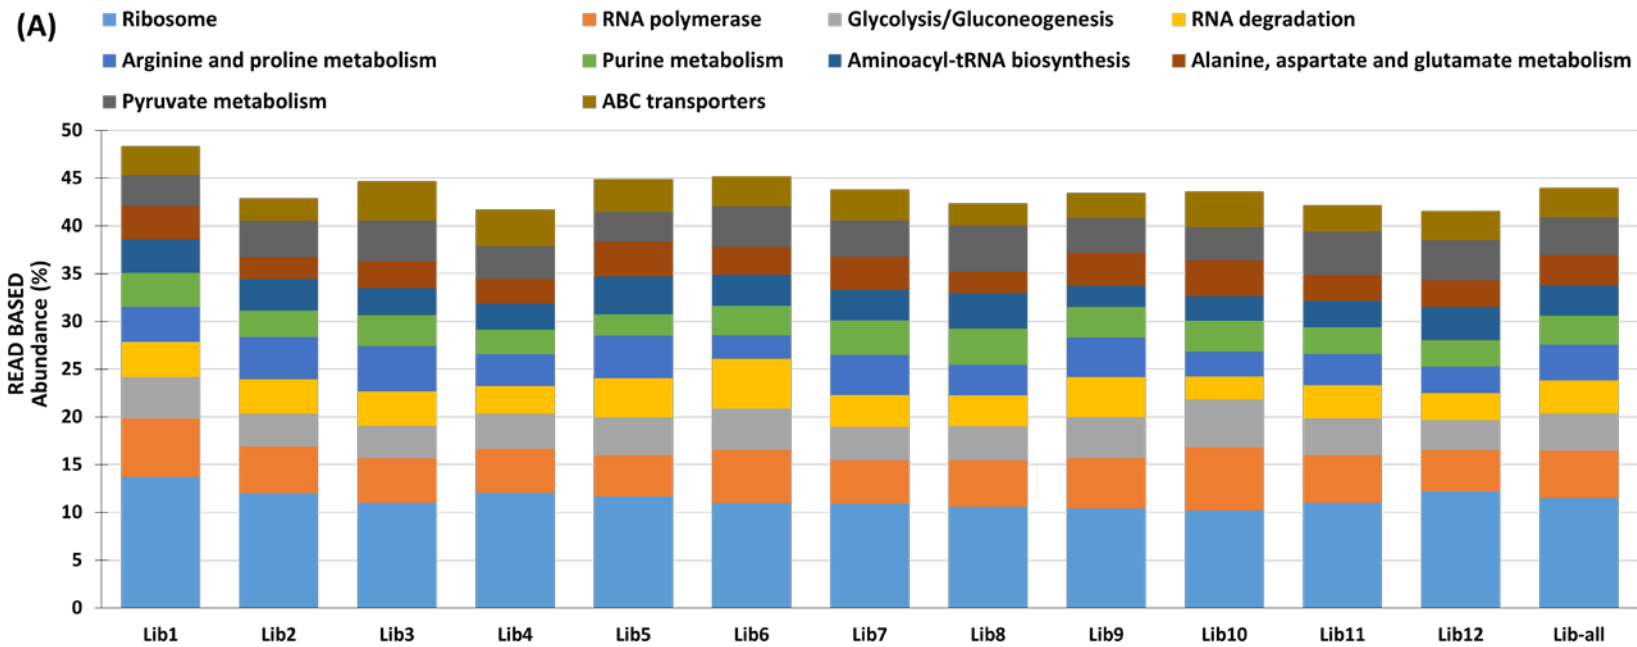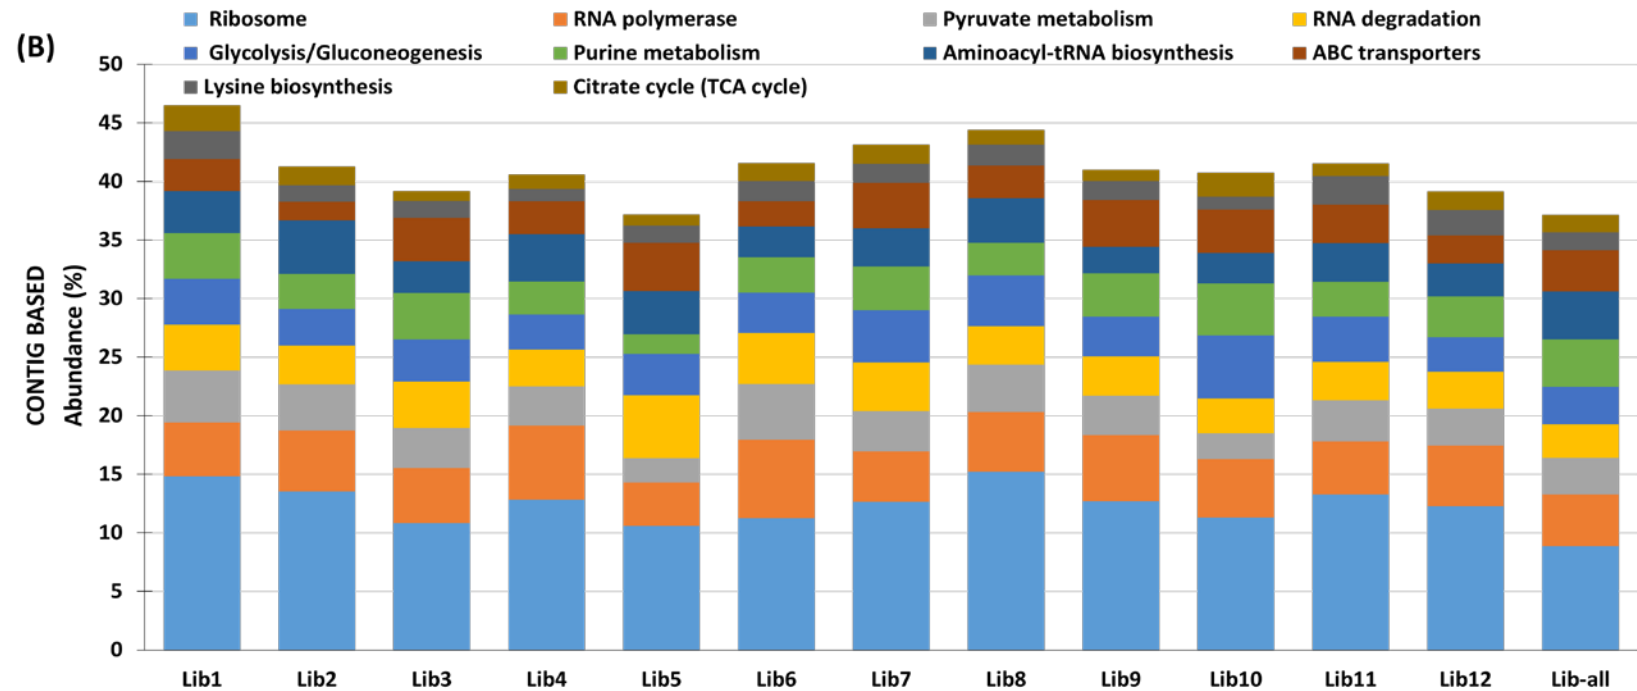



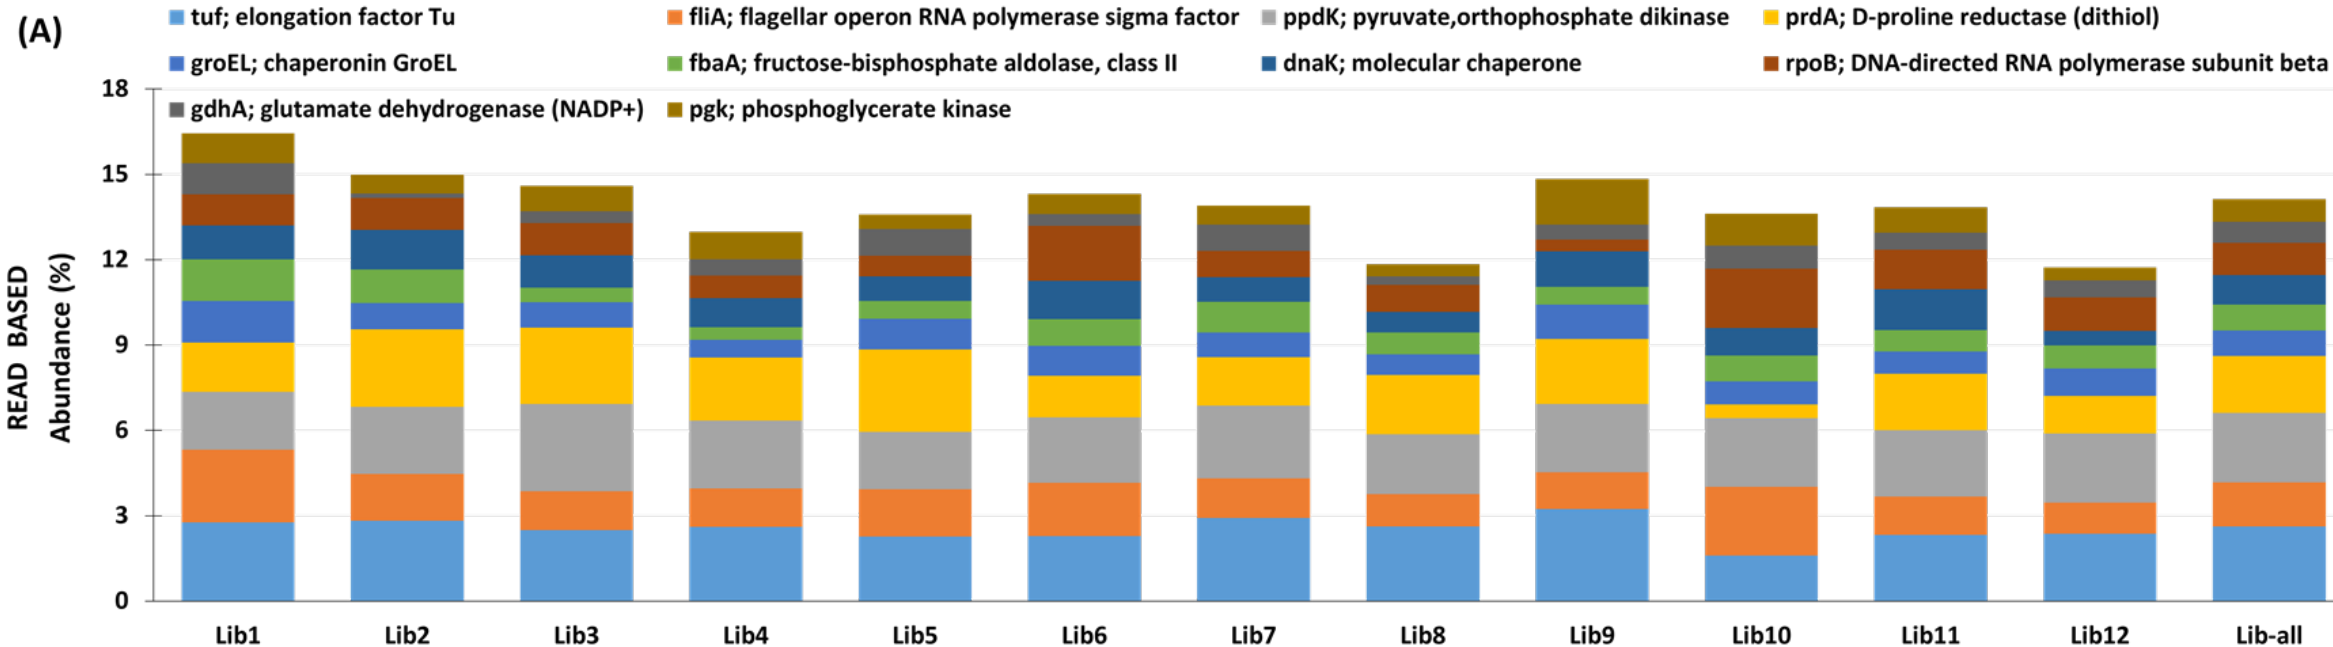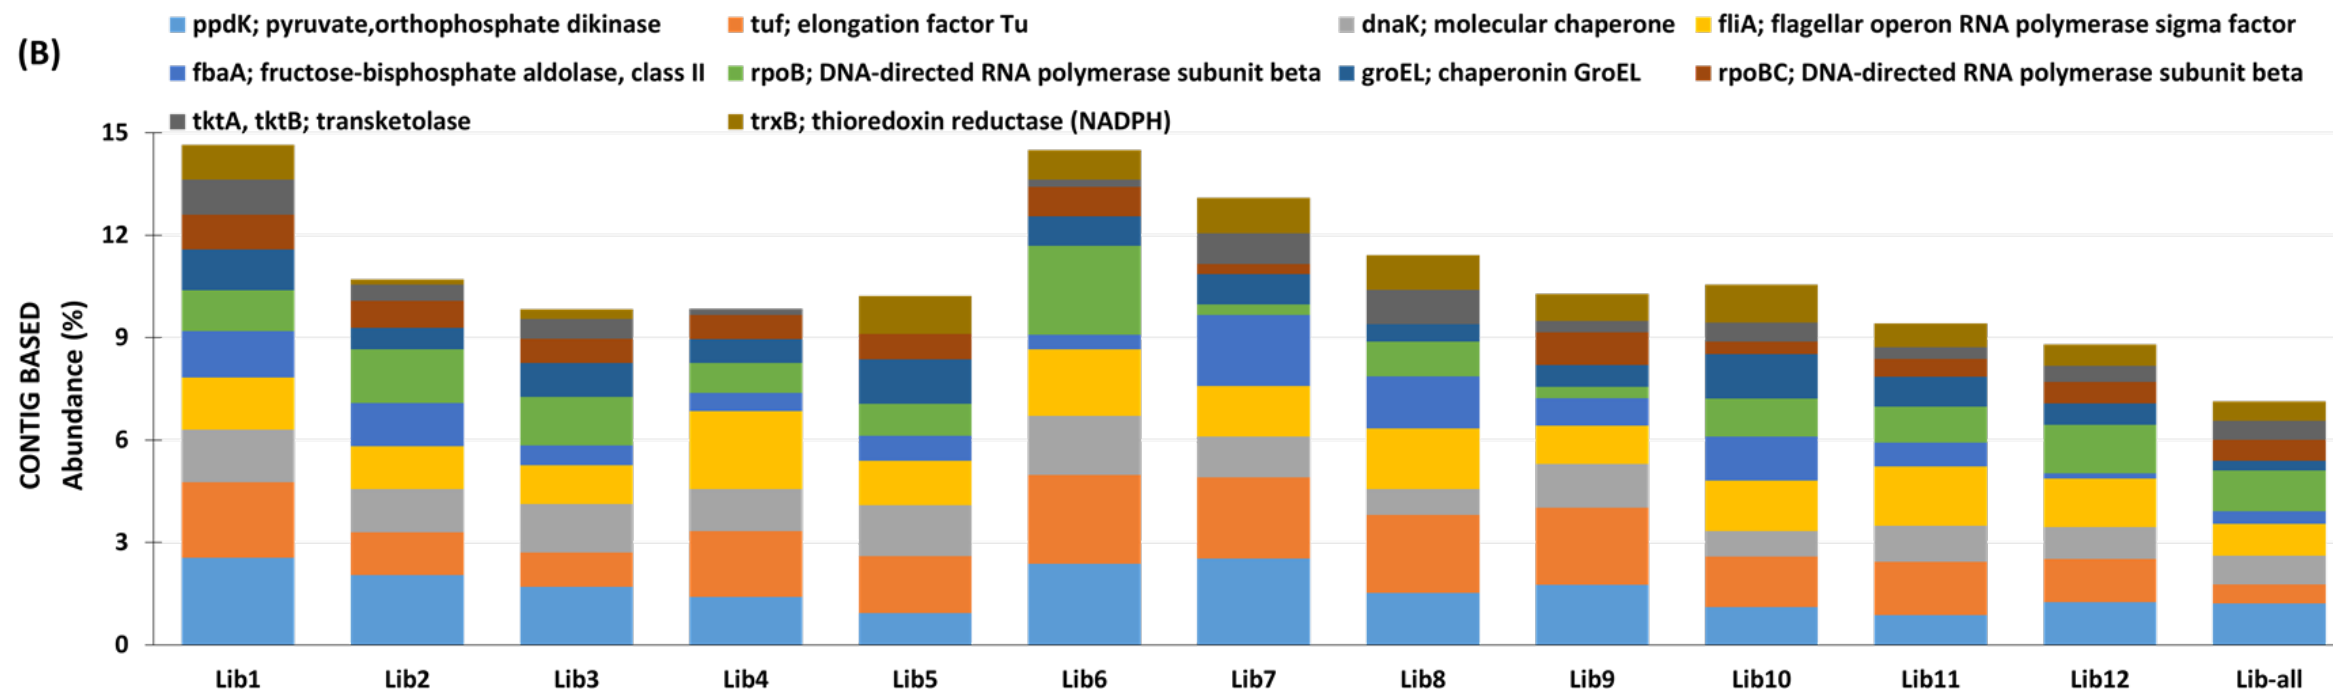

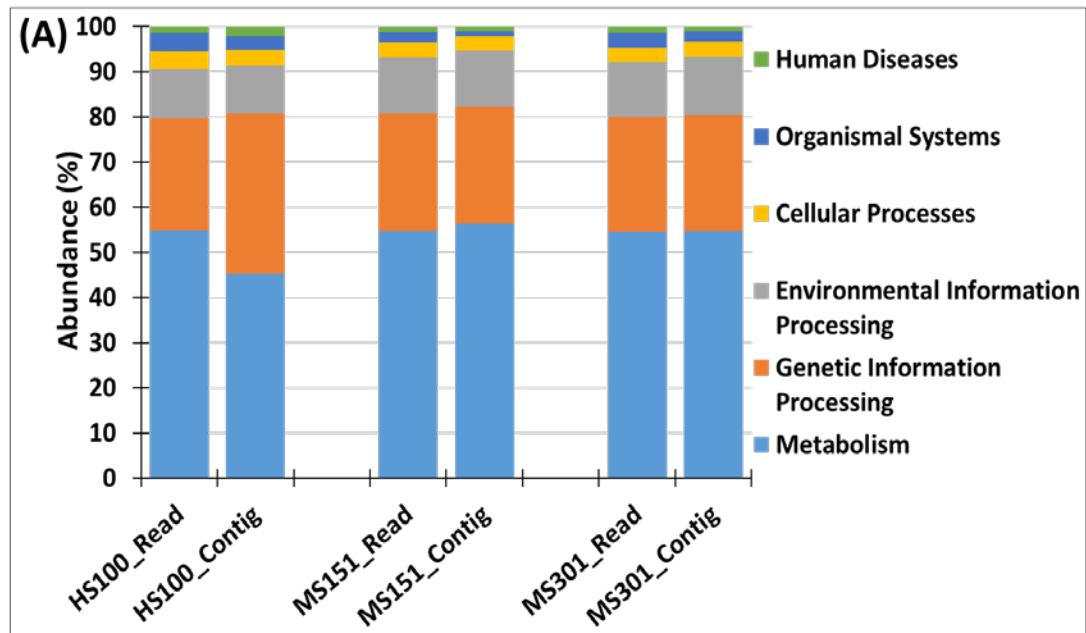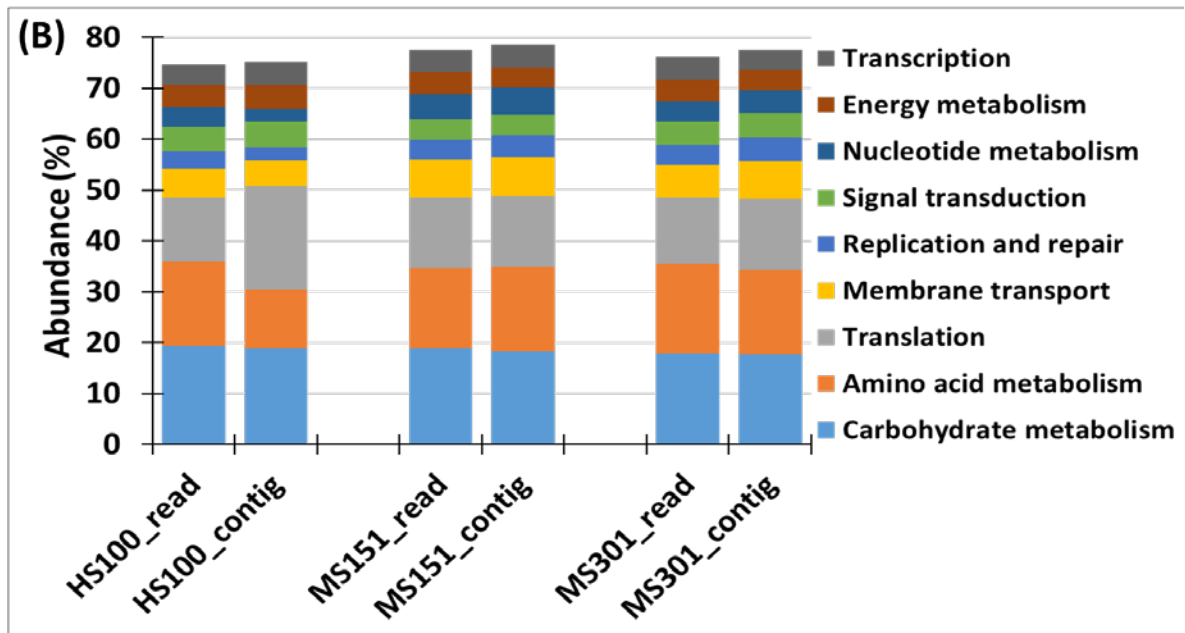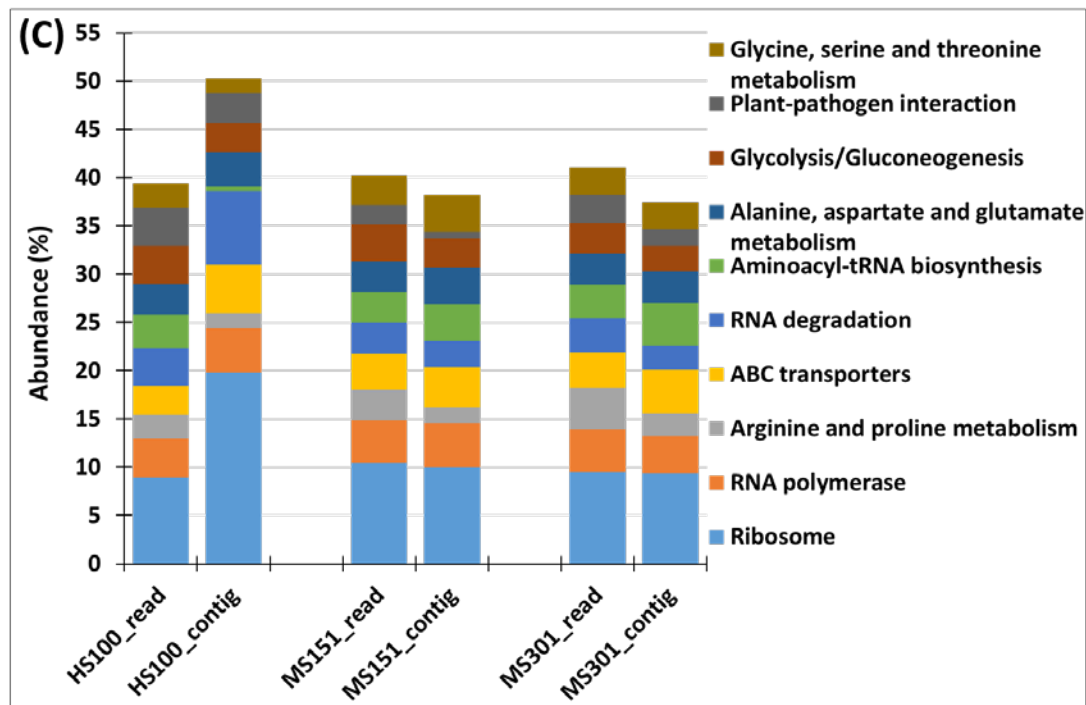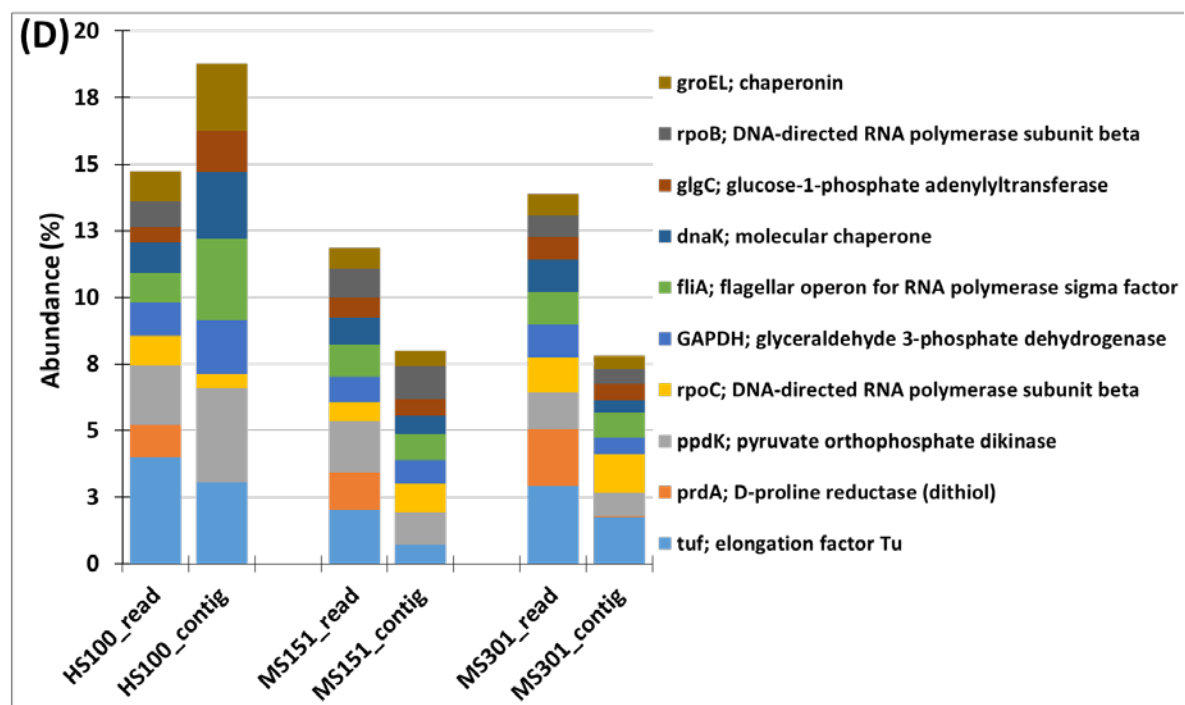

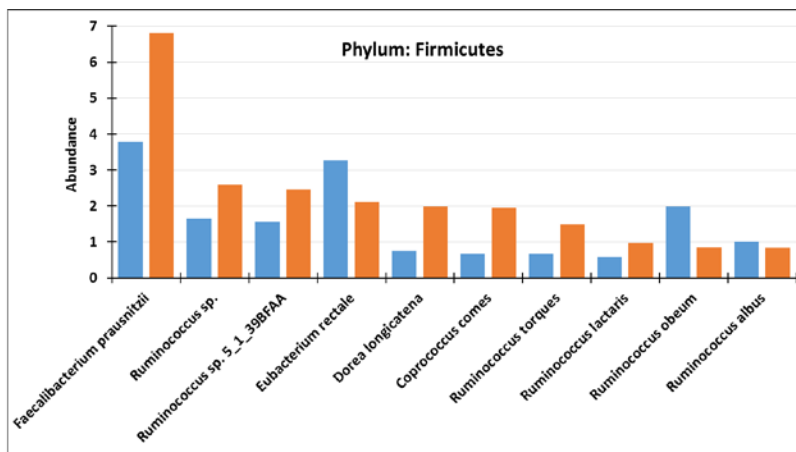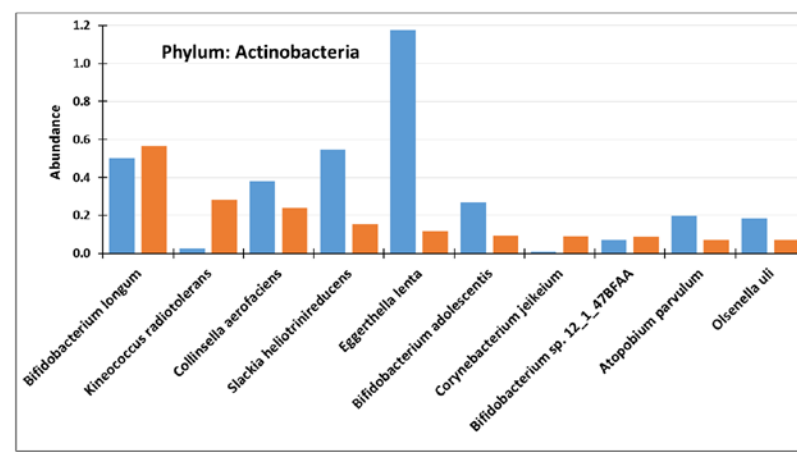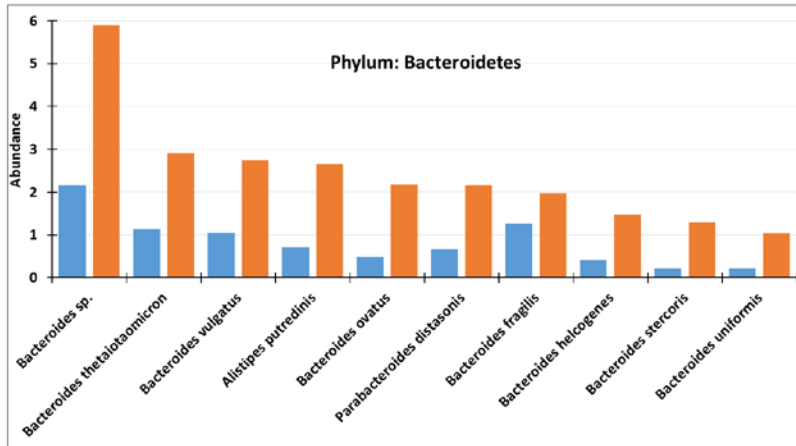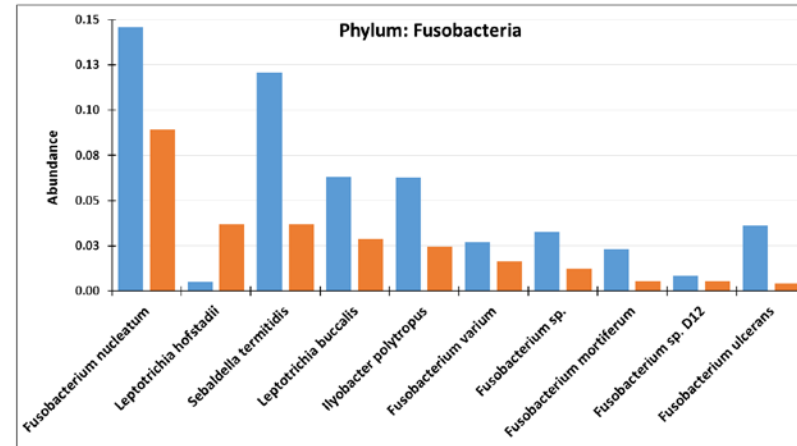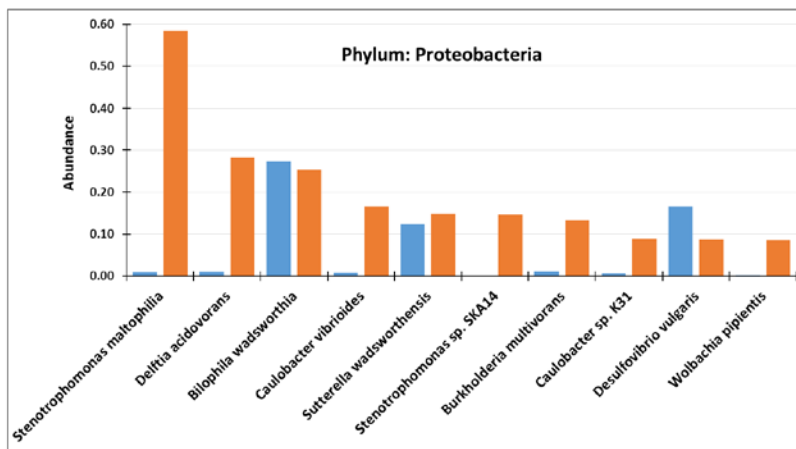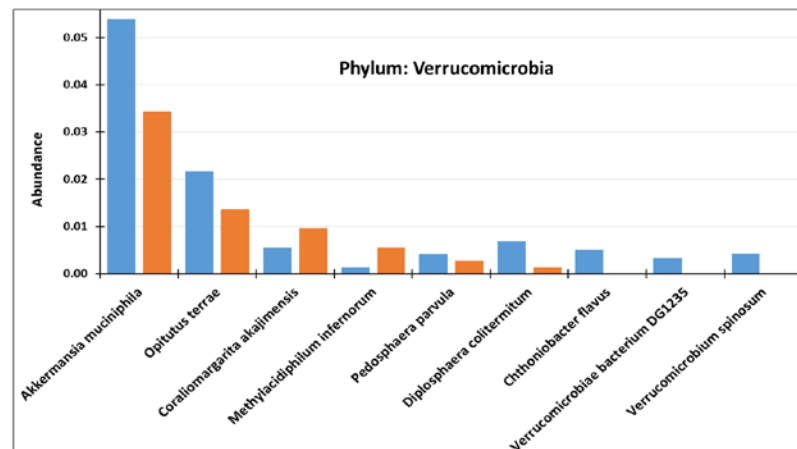

■ MG-HS100-MS151-MS301 ■ MT-HS100-MS151-MS301

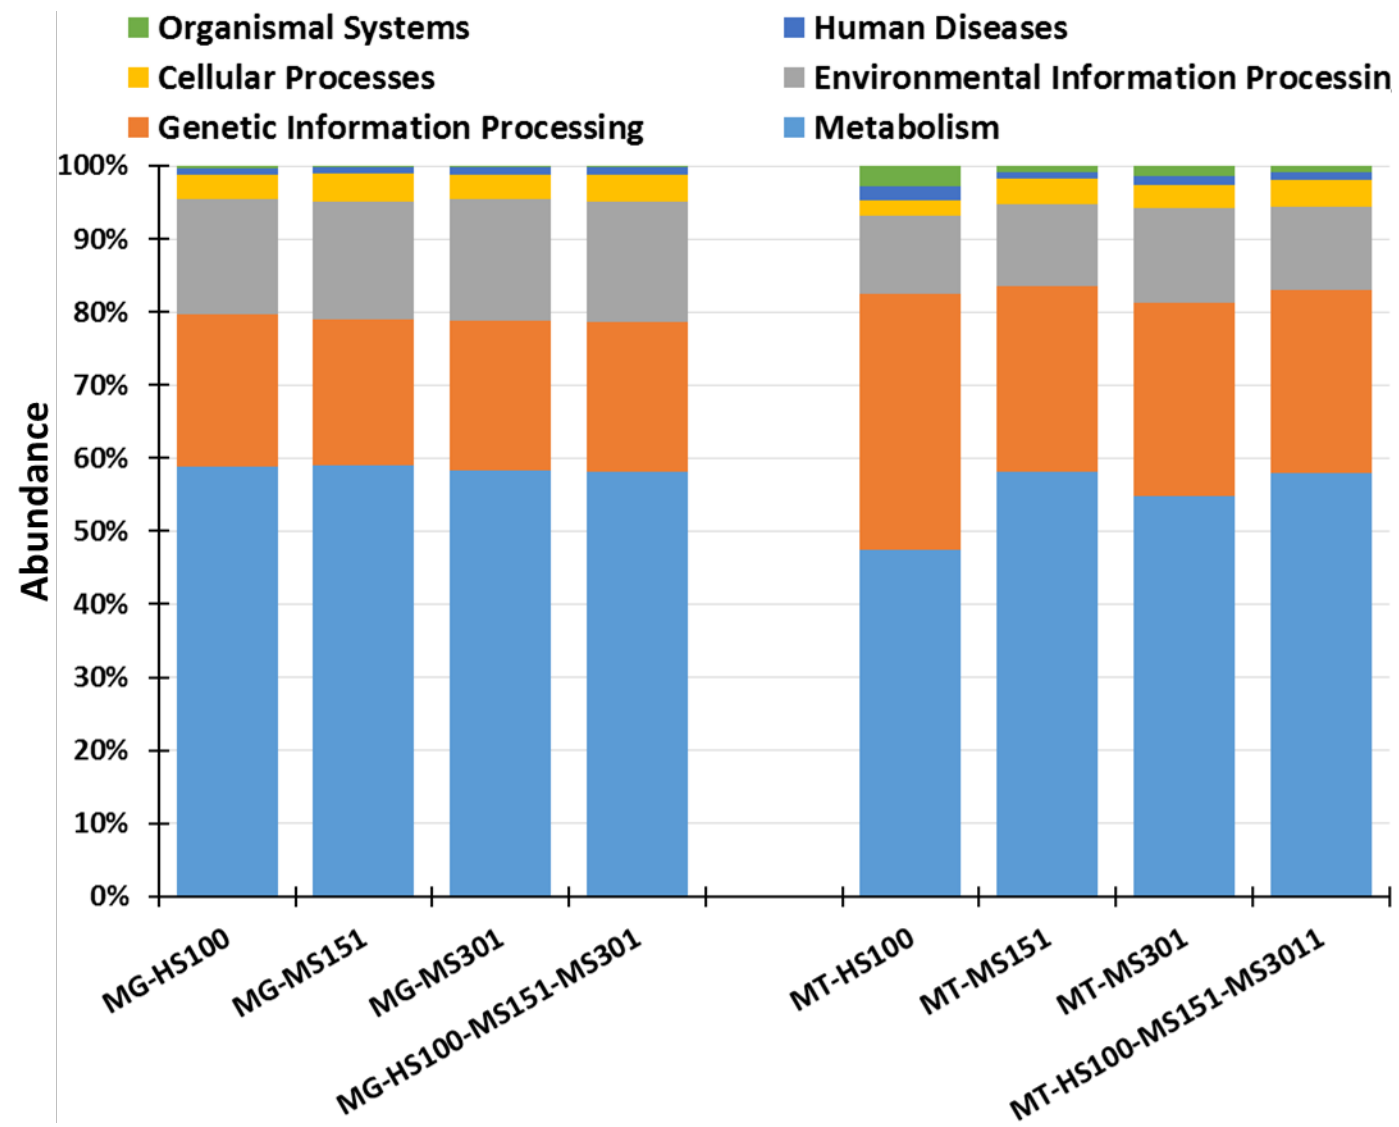

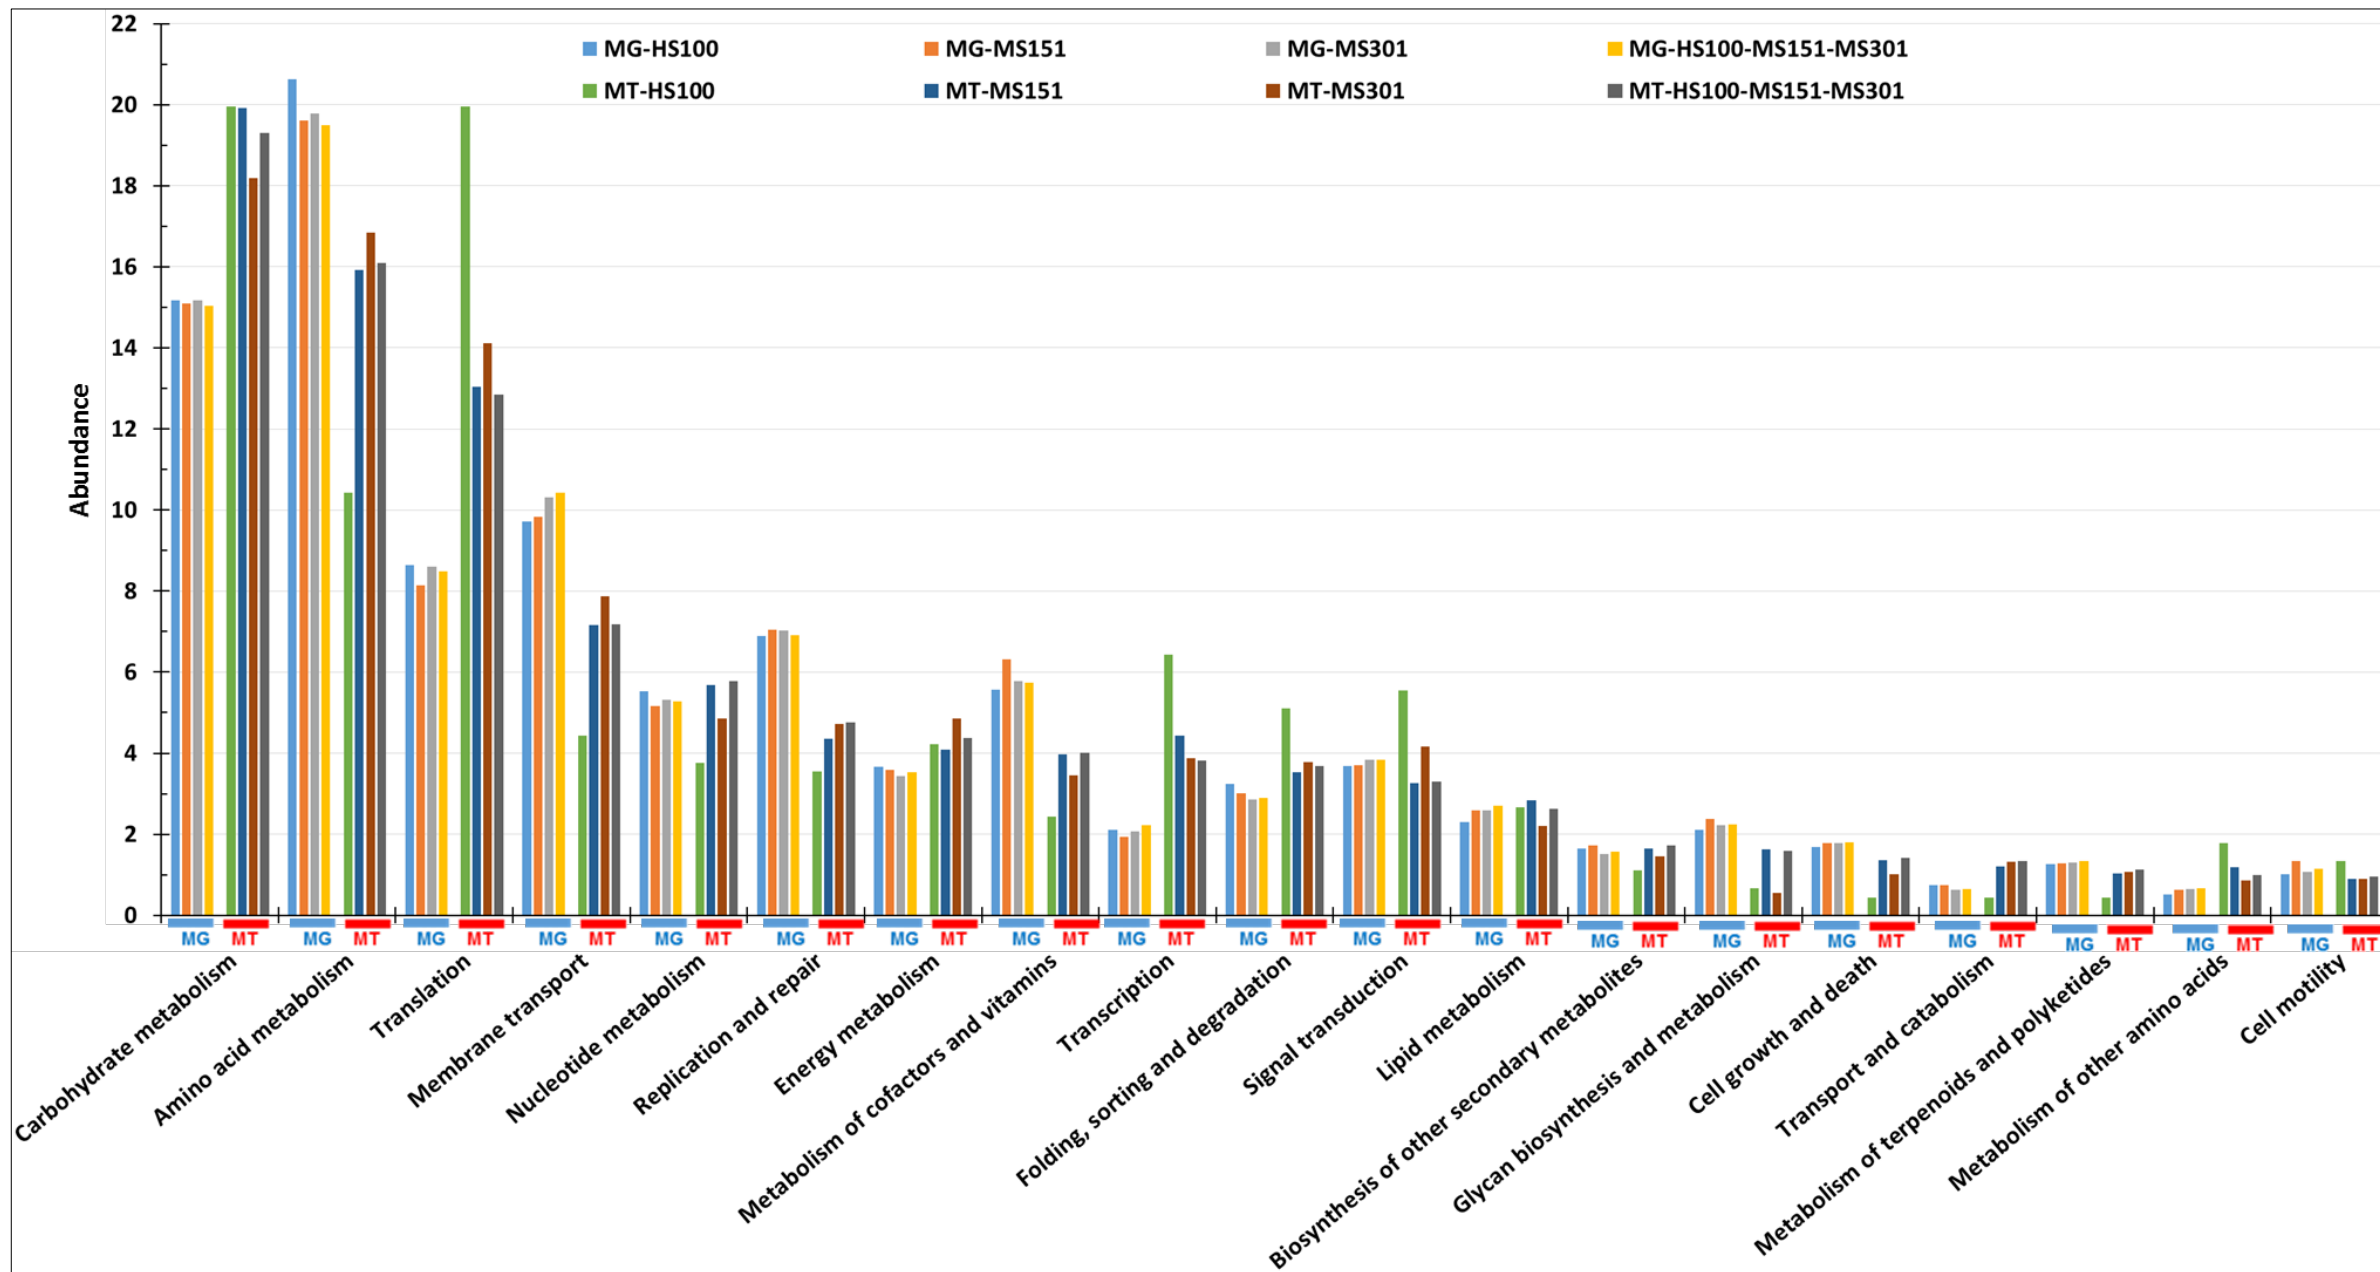

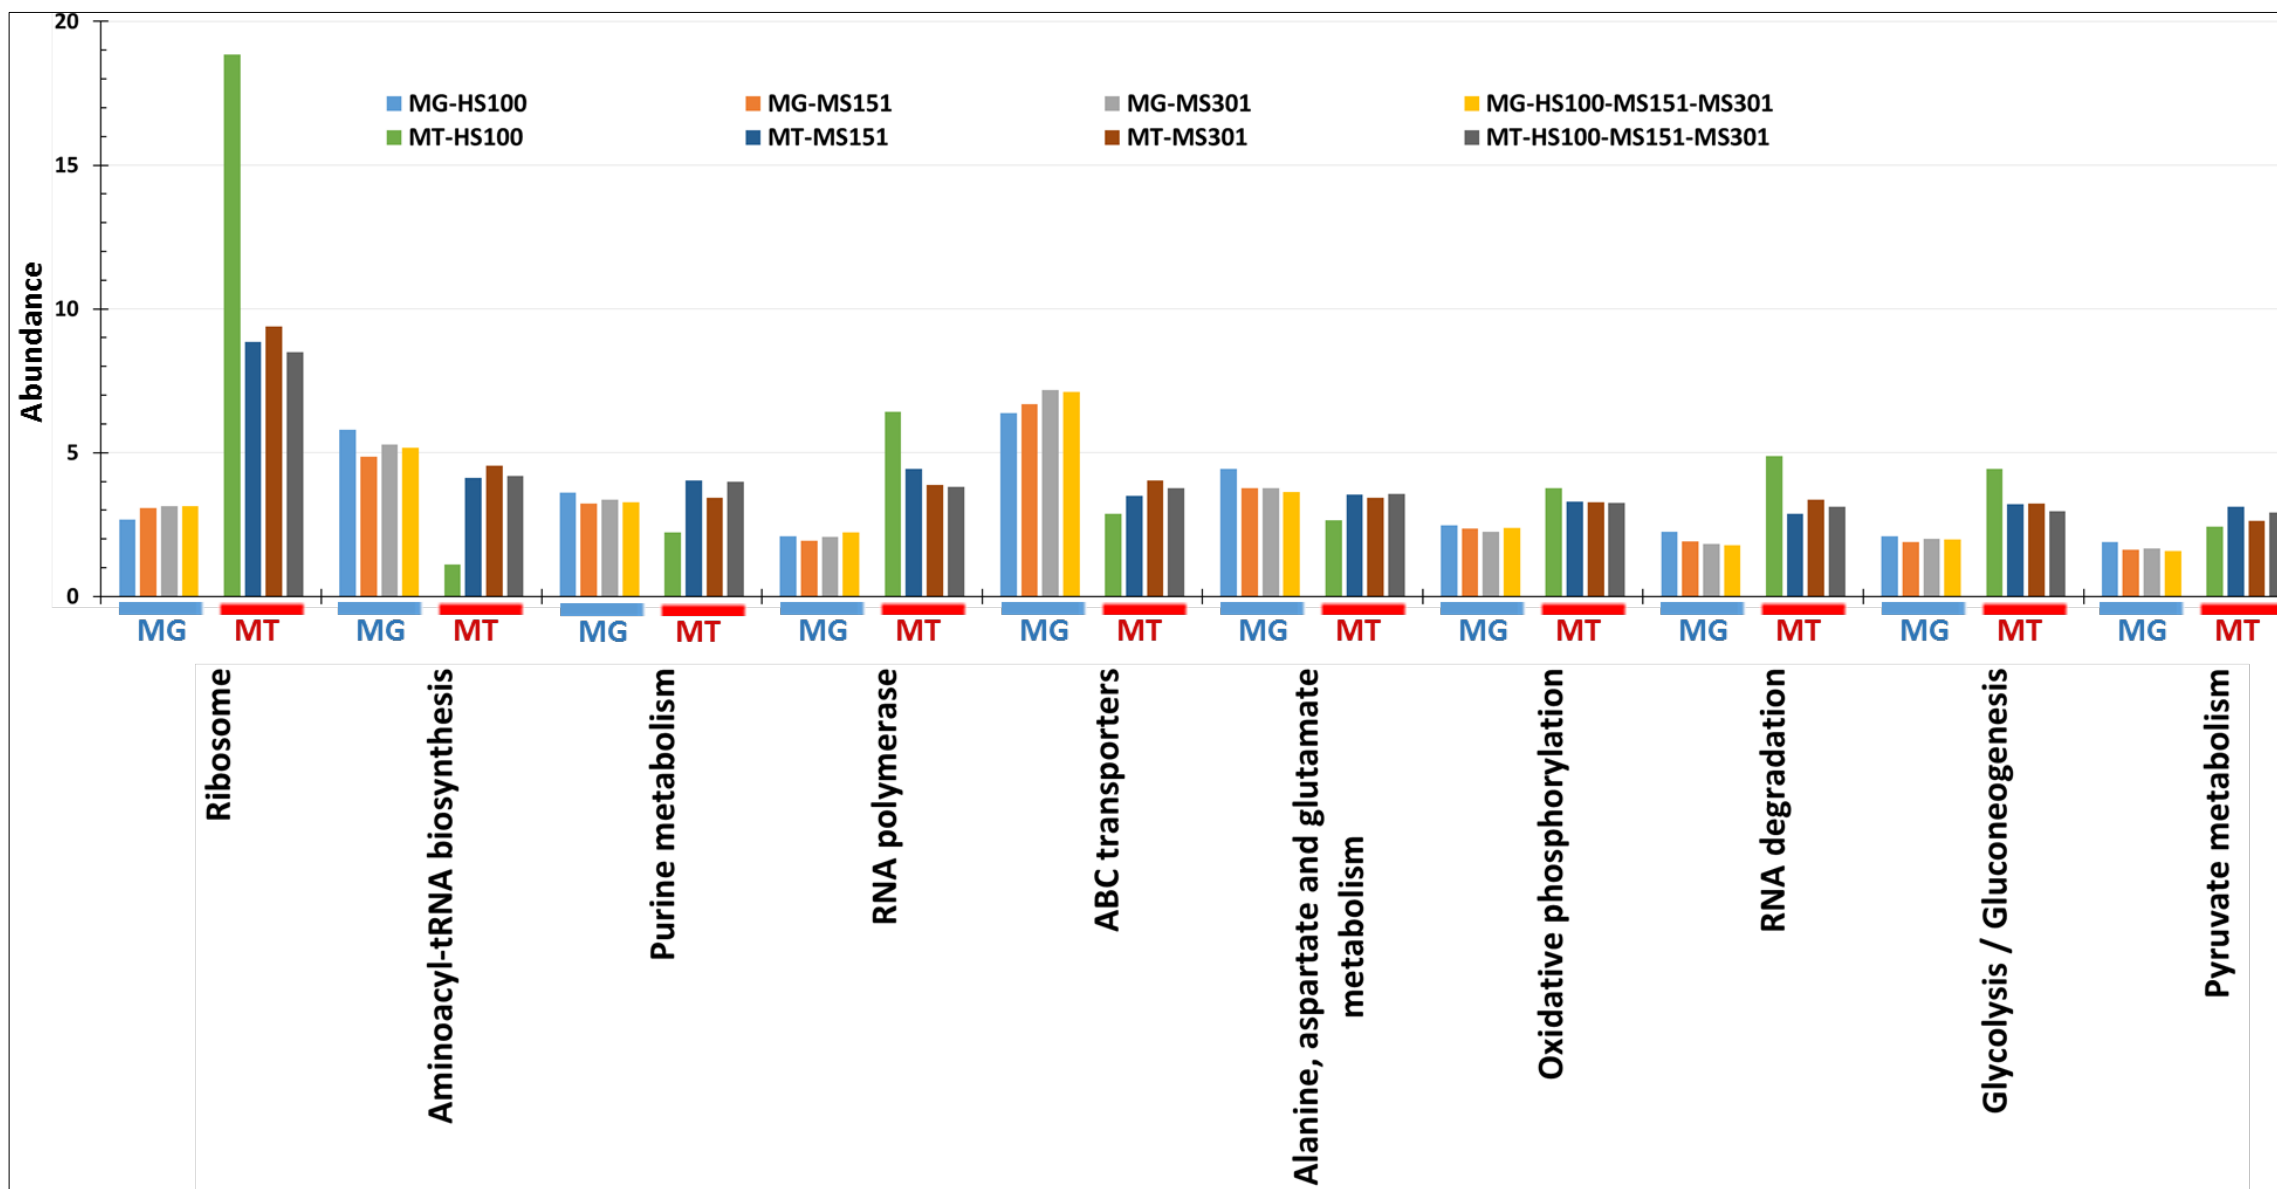

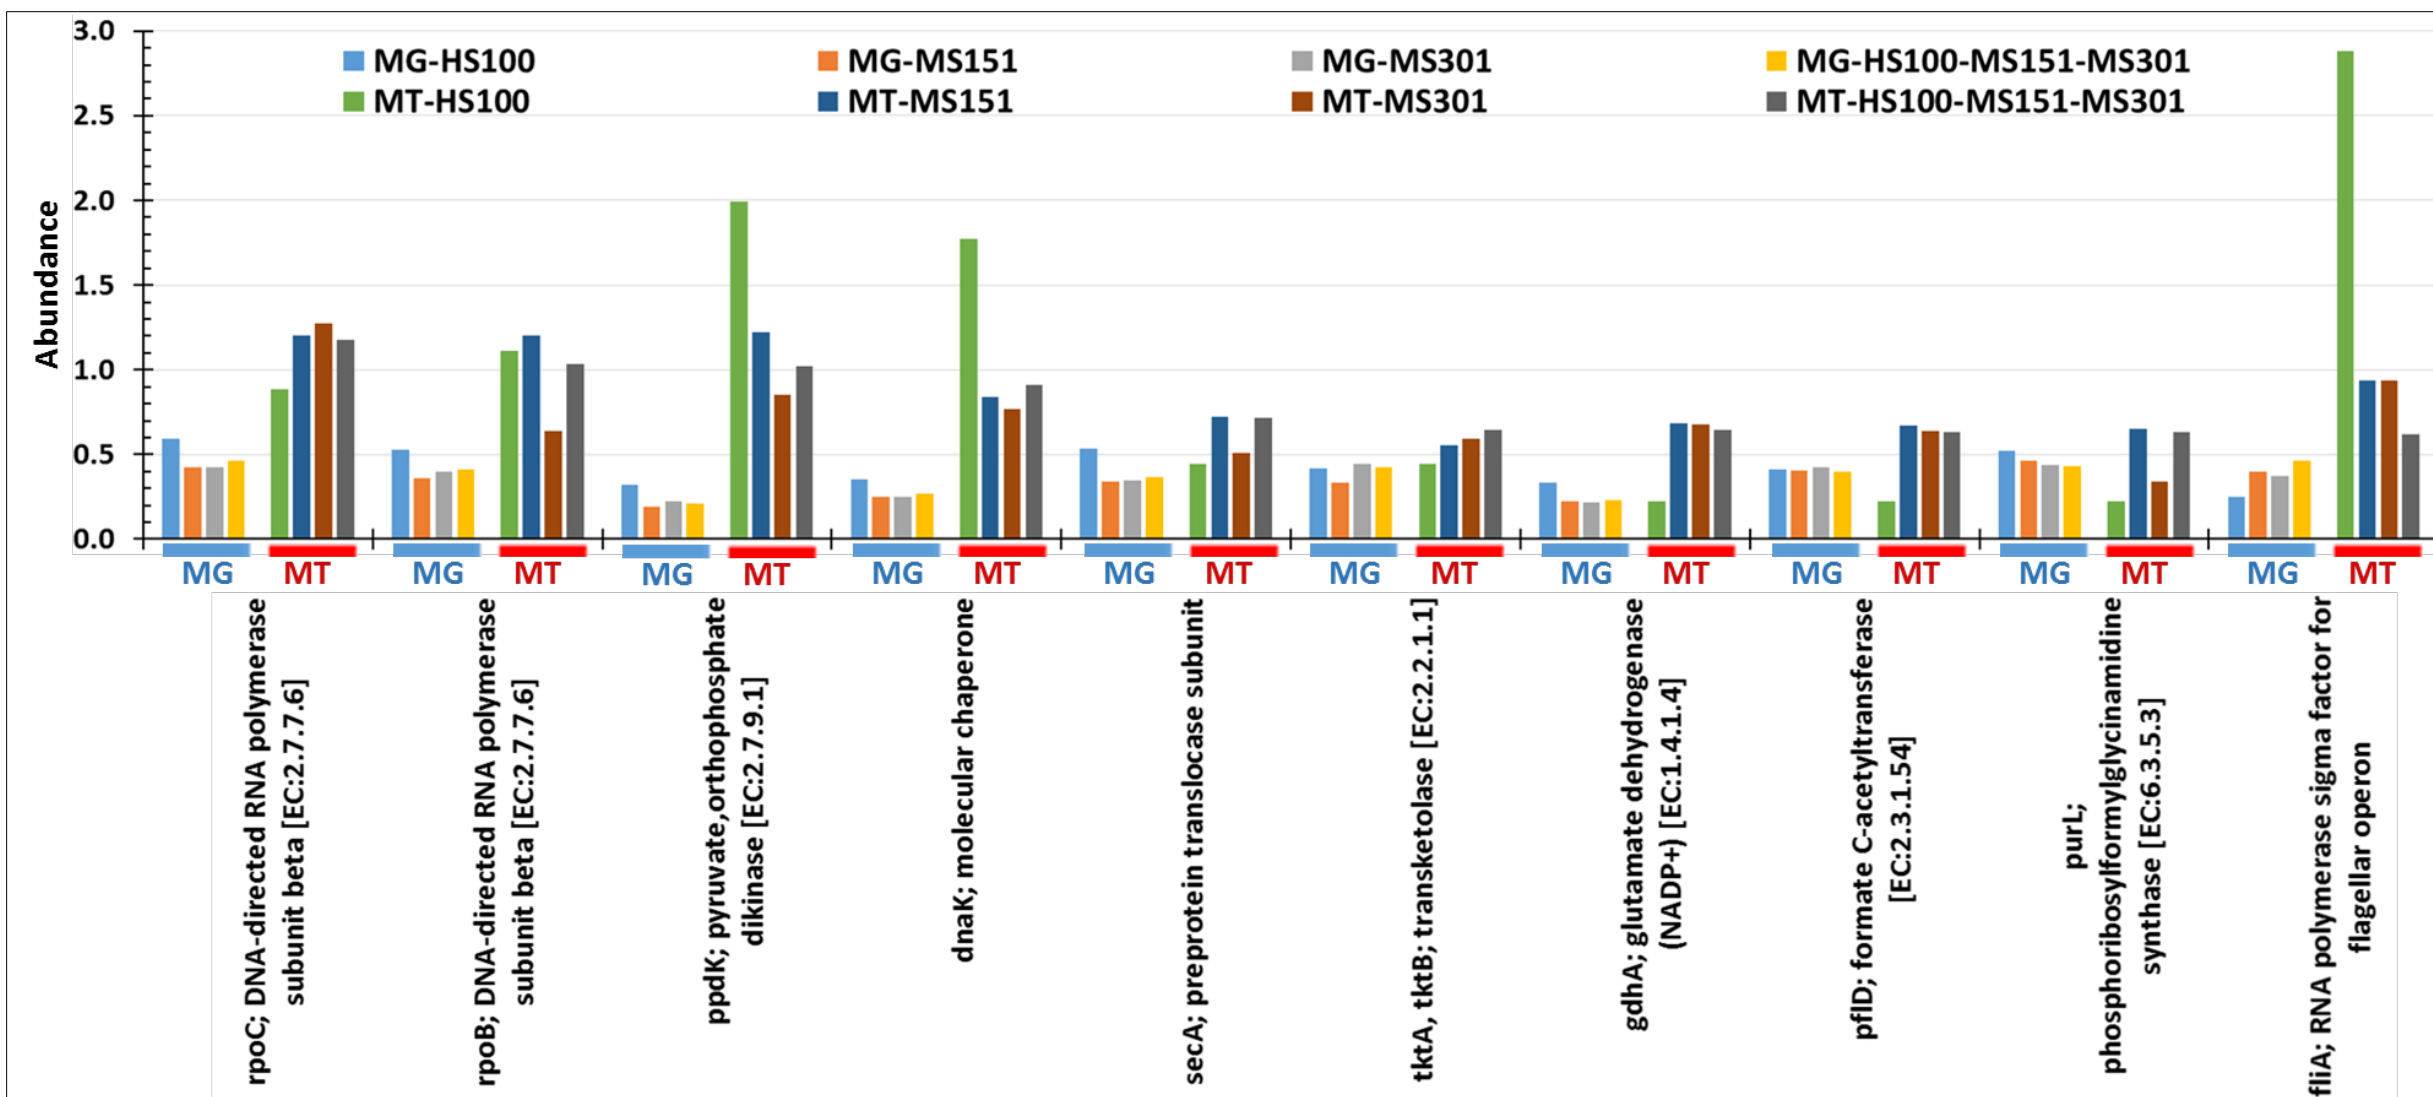

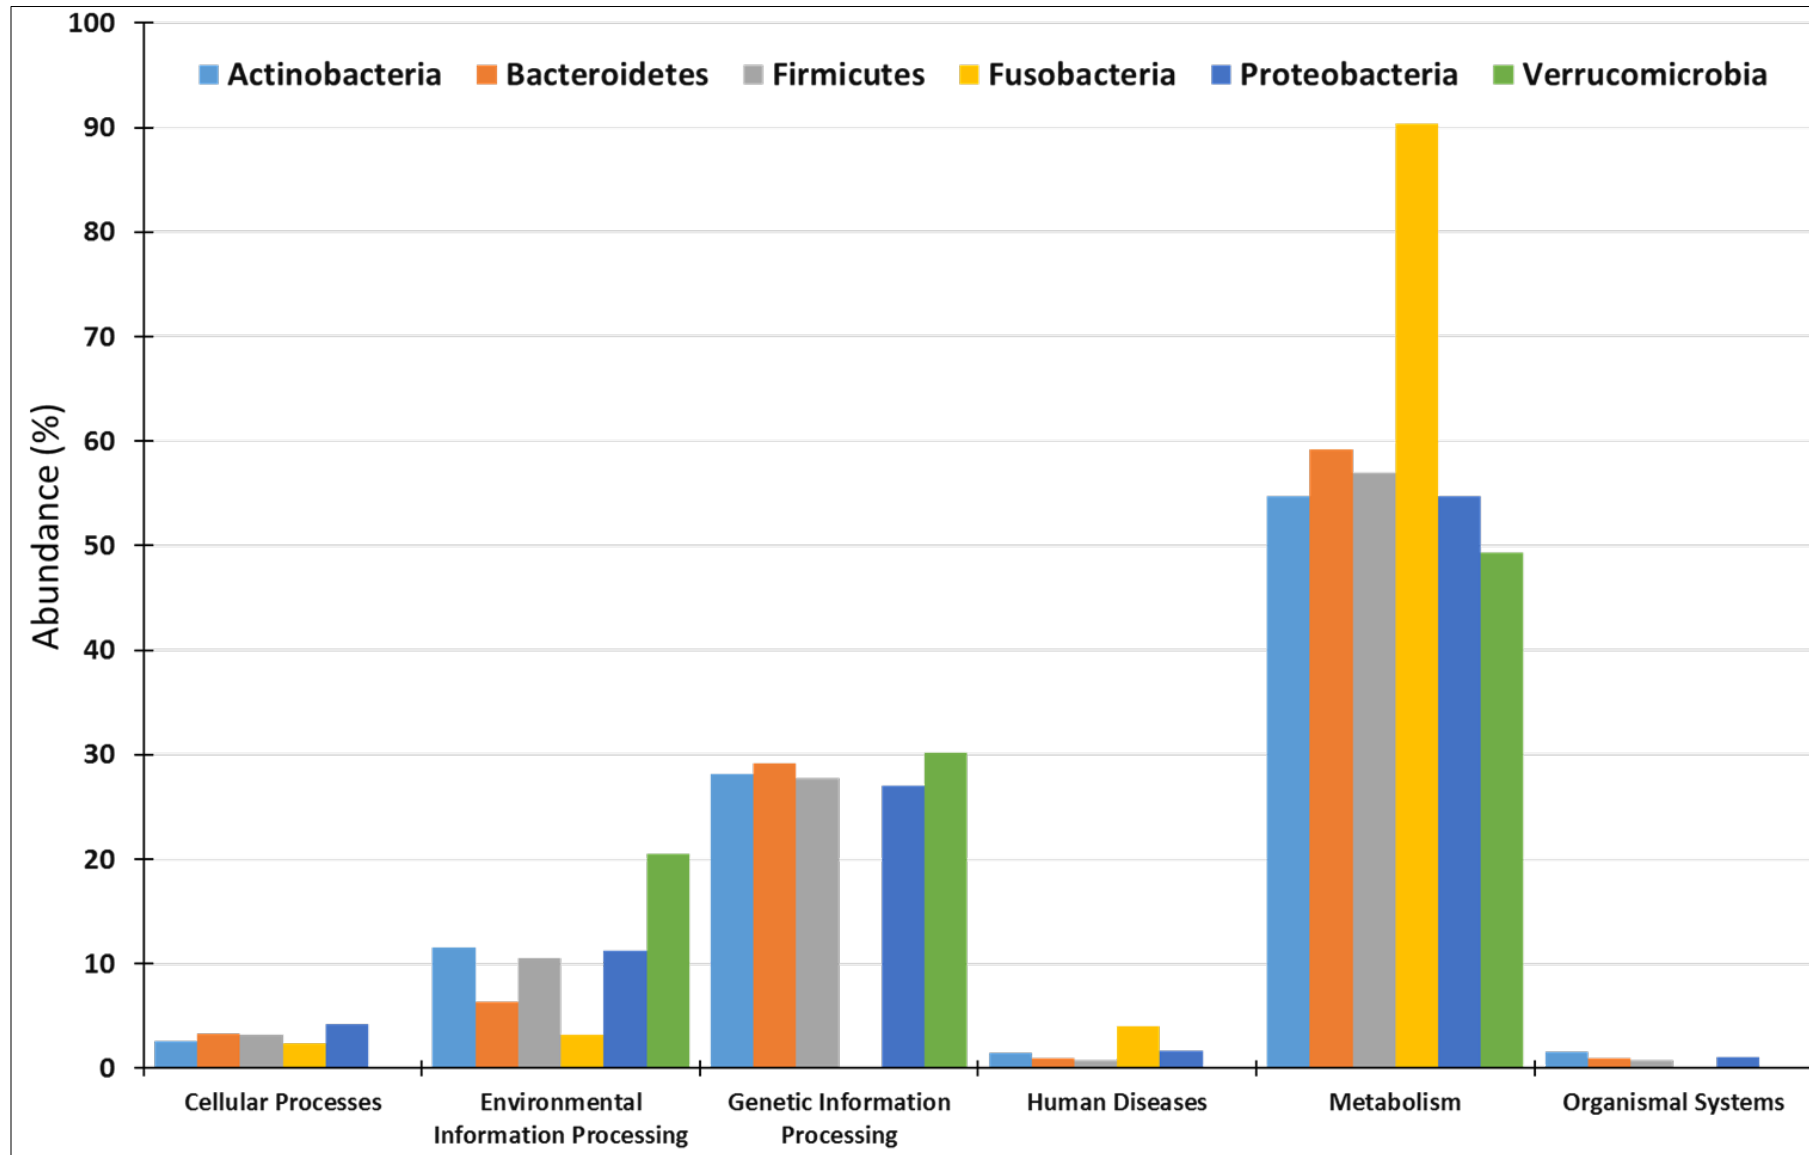



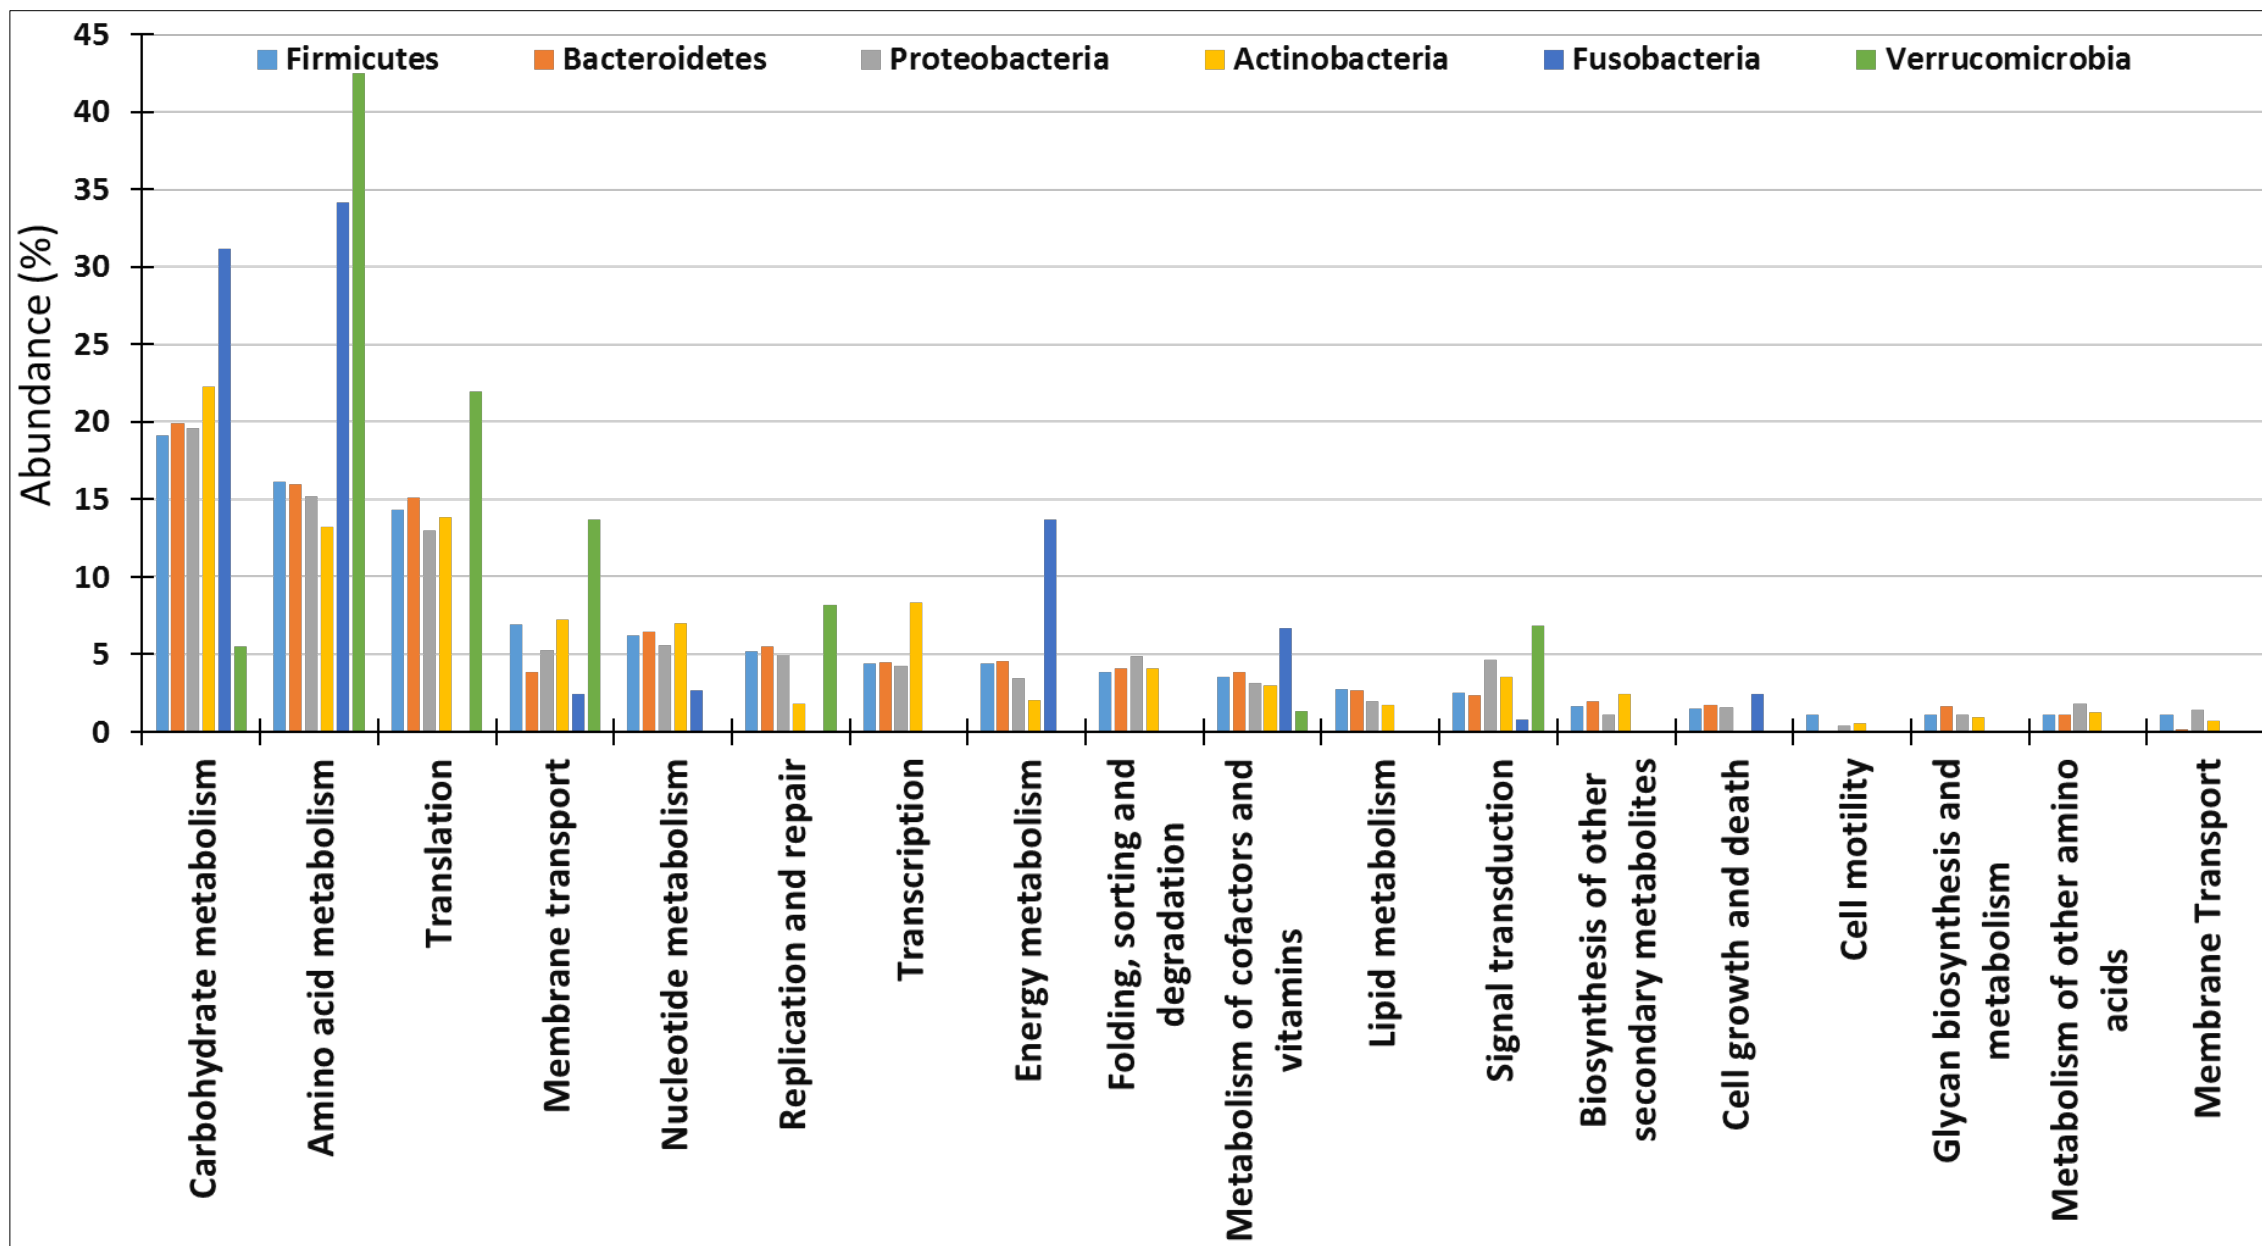

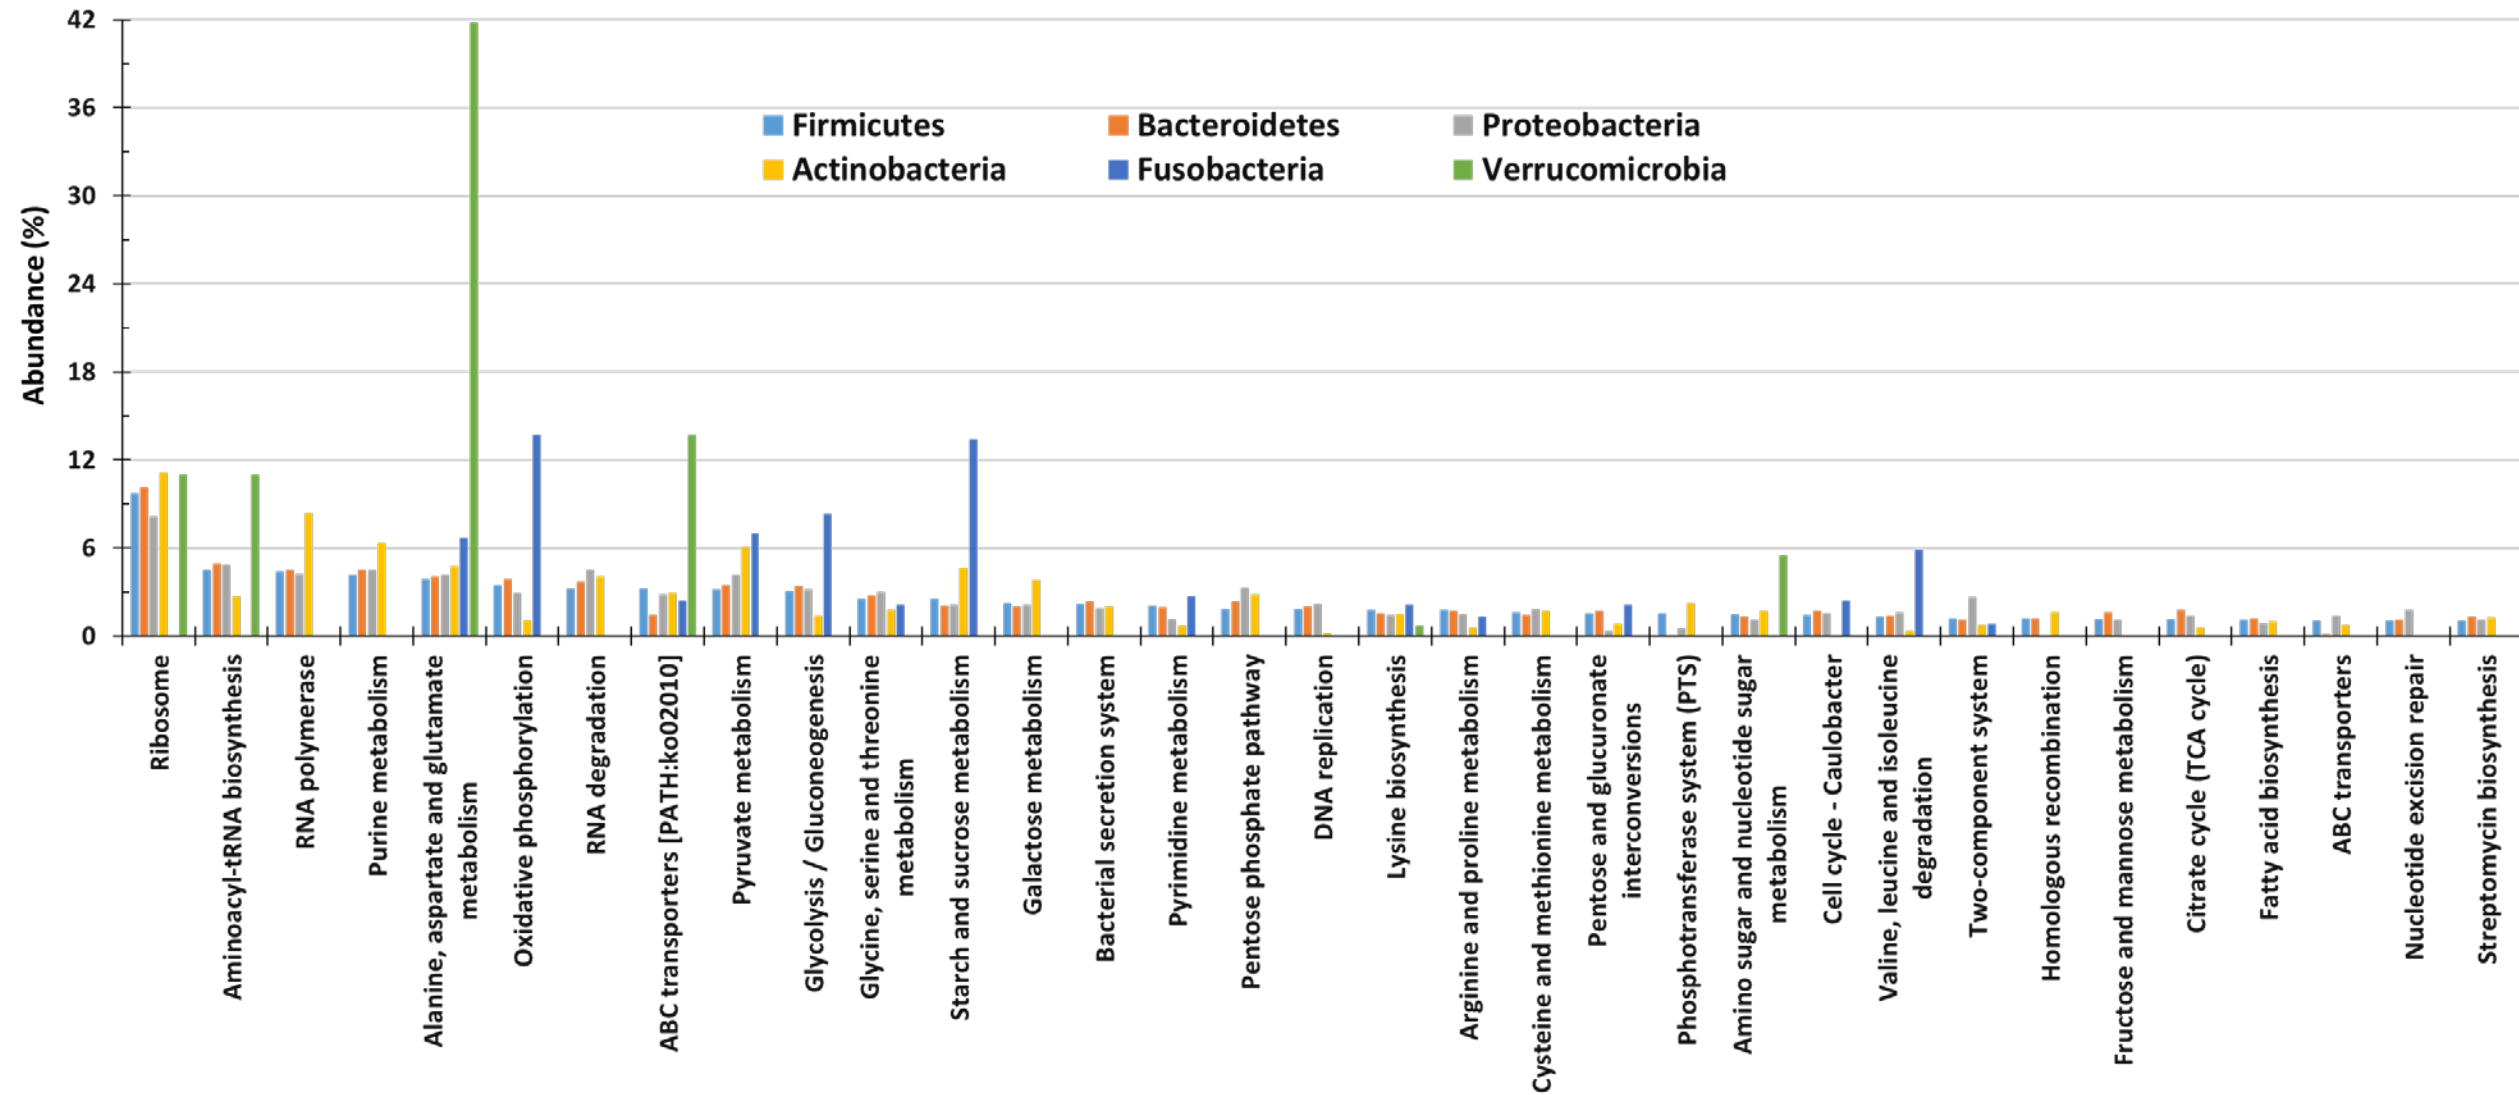

## Species

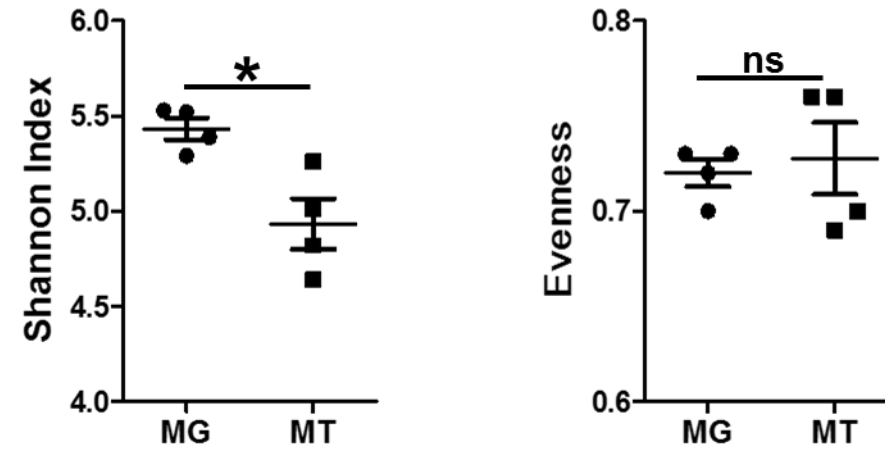

## Functions

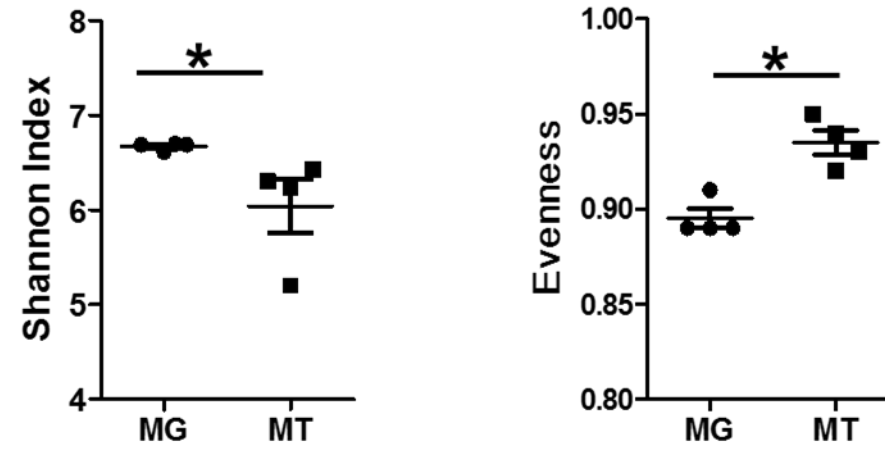

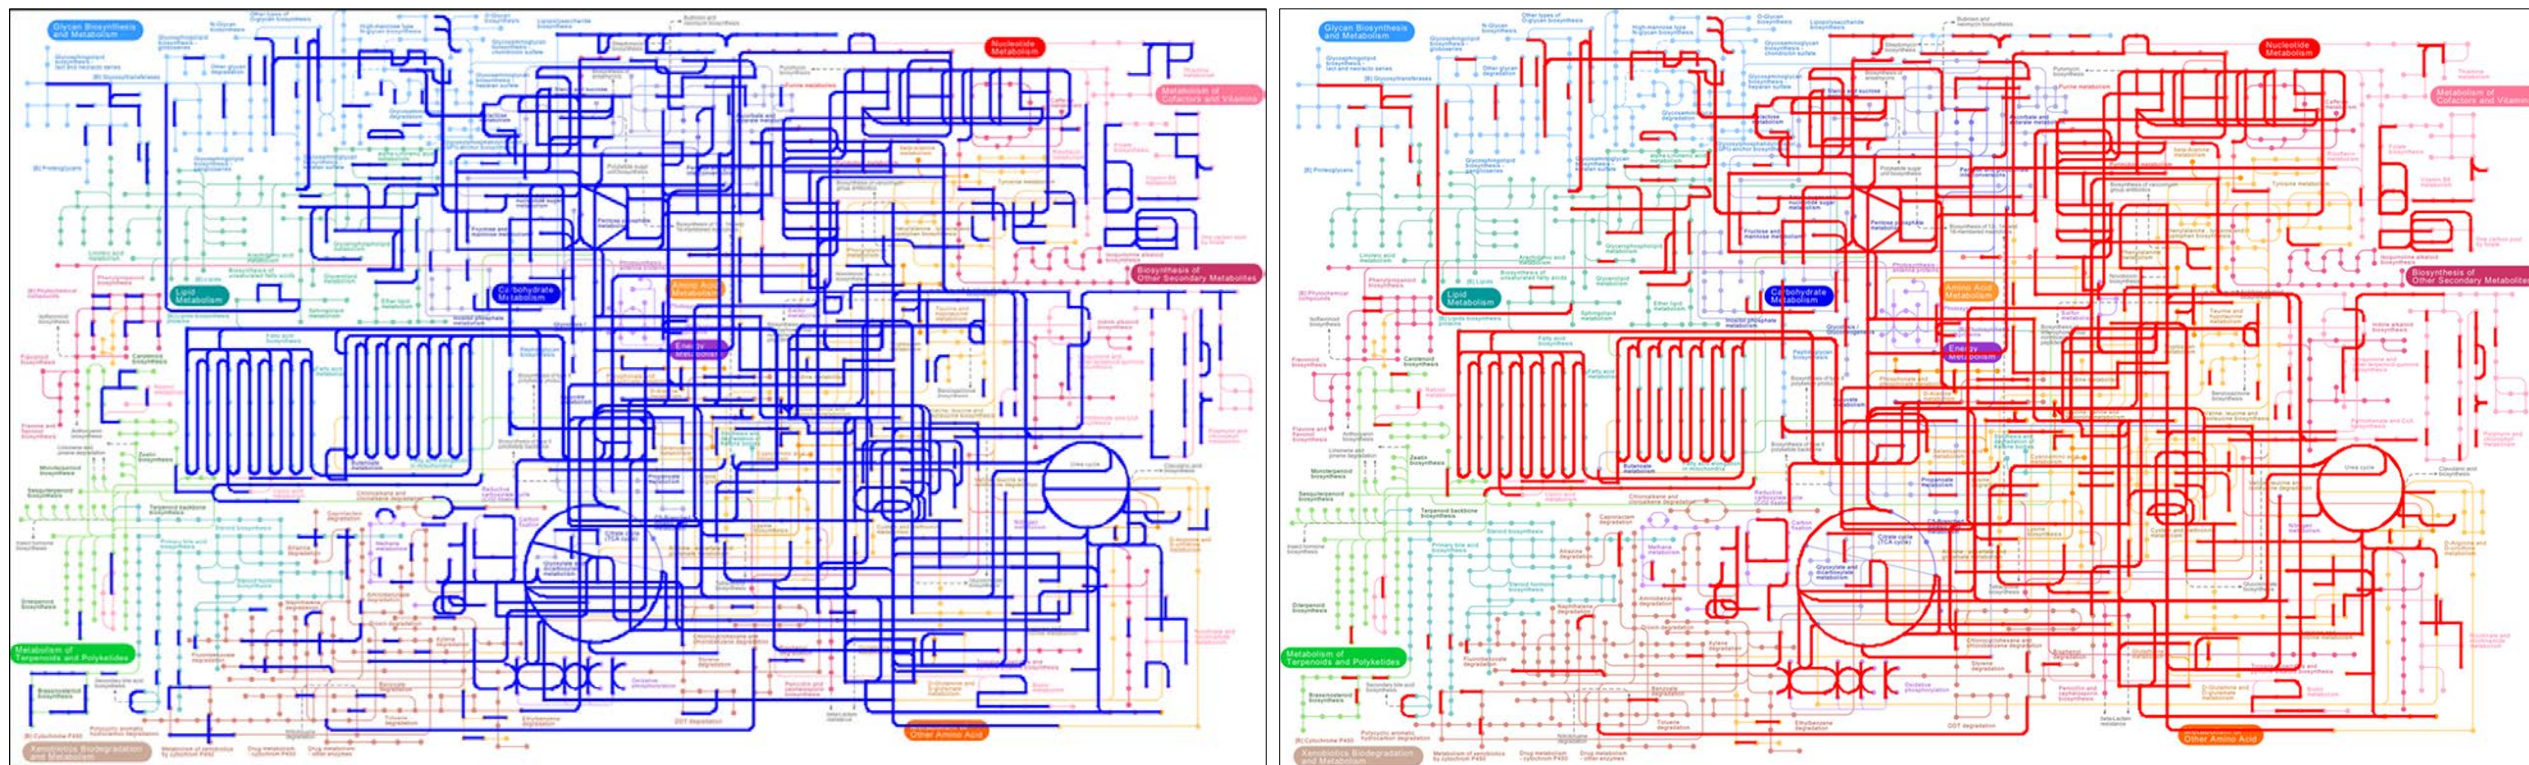

**Blue: Exclusive in metagenome; Red: Exclusive in metatranscriptome**

**Supplementary Table 1. List of bacterial species identified based on read based analysis. Only above 1% are mentioned and sorted high to low on Lib1.**

| Phylum         | Species                                | Lib1 | Lib2 | Lib3 | Lib4 | Lib5 | Lib6 | Lib7 | Lib8 | Lib9 | Lib10 | Lib11 | Lib12 | Lib-all |
|----------------|----------------------------------------|------|------|------|------|------|------|------|------|------|-------|-------|-------|---------|
| Firmicutes     | <i>Ruminococcus torques</i>            | 7.29 | 7.19 | 7.34 | 7.11 | 7.79 | 7.57 | 6.99 | 7.31 | 7.05 | 7.12  | 6.86  | 7.12  | 6.63    |
| Firmicutes     | <i>Ruminococcus obeum</i>              | 6.79 | 6.78 | 6.55 | 6.82 | 6.86 | 6.76 | 6.57 | 6.72 | 6.82 | 6.36  | 6.63  | 6.49  | 6.07    |
| Firmicutes     | <i>Faecalibacterium prausnitzii</i>    | 5.03 | 5.11 | 4.98 | 5.14 | 4.98 | 5.11 | 4.84 | 4.93 | 4.86 | 5.01  | 5.24  | 5.13  | 5.24    |
| Firmicutes     | <i>Heliobacterium modesticaldum</i>    | 3.10 | 3.21 | 2.97 | 3.10 | 3.15 | 3.20 | 3.27 | 3.41 | 3.79 | 3.21  | 3.09  | 3.17  | 3.01    |
| Actinobacteria | <i>Kineococcus radiotolerans</i>       | 3.04 | 2.89 | 3.03 | 3.00 | 3.14 | 2.85 | 2.92 | 3.05 | 2.97 | 3.14  | 3.00  | 3.06  | 2.92    |
| Firmicutes     | <i>Lactobacillus crispatus</i>         | 2.79 | 3.00 | 2.99 | 2.99 | 2.91 | 2.70 | 2.92 | 2.89 | 2.92 | 2.89  | 2.97  | 3.01  | 2.66    |
| Firmicutes     | <i>Eubacterium ventriosum</i>          | 2.63 | 2.71 | 2.45 | 2.52 | 2.31 | 2.50 | 2.53 | 2.44 | 2.64 | 2.49  | 2.45  | 2.50  | 2.29    |
| Firmicutes     | <i>Coprococcus eutactus</i>            | 2.35 | 2.45 | 2.76 | 2.57 | 2.40 | 2.38 | 2.47 | 2.54 | 2.31 | 2.50  | 2.30  | 2.46  | 2.46    |
| Firmicutes     | <i>Ruminococcus gnavus</i>             | 2.25 | 2.22 | 2.28 | 2.23 | 2.43 | 2.42 | 2.37 | 2.36 | 2.20 | 2.29  | 2.23  | 2.23  | 2.04    |
| Firmicutes     | <i>Anaerostipes caccae</i>             | 2.25 | 2.13 | 2.20 | 2.26 | 2.21 | 2.22 | 2.18 | 2.18 | 2.15 | 2.08  | 2.02  | 2.18  | 2.01    |
| Firmicutes     | <i>Dorea longicatena</i>               | 2.22 | 2.20 | 2.16 | 2.35 | 2.07 | 2.30 | 2.15 | 2.11 | 2.17 | 2.06  | 2.26  | 2.11  | 2.15    |
| Firmicutes     | <i>Pseudoflavonifractor capillosus</i> | 2.06 | 2.11 | 2.15 | 2.05 | 1.80 | 1.88 | 1.83 | 1.72 | 2.03 | 1.90  | 1.94  | 1.87  | 1.76    |
| Firmicutes     | <i>Anaerotruncus colihominis</i>       | 2.00 | 2.10 | 2.01 | 2.02 | 1.98 | 2.24 | 2.14 | 2.07 | 2.00 | 2.30  | 2.20  | 2.25  | 1.85    |
| Firmicutes     | <i>Clostridium botulinum</i>           | 1.91 | 1.72 | 1.83 | 1.83 | 1.76 | 1.82 | 1.82 | 1.82 | 1.76 | 1.89  | 1.77  | 1.85  | 1.83    |
| Proteobacteria | <i>Burkholderia multivorans</i>        | 1.76 | 1.68 | 1.67 | 1.69 | 1.84 | 1.91 | 1.96 | 1.83 | 1.81 | 1.91  | 1.69  | 1.75  | 1.67    |
| Firmicutes     | <i>Ruminococcus lactaris</i>           | 1.61 | 1.46 | 1.54 | 1.61 | 1.46 | 1.56 | 1.43 | 1.46 | 1.45 | 1.42  | 1.39  | 1.44  | 1.38    |
| Firmicutes     | <i>Clostridium leptum</i>              | 1.39 | 1.62 | 1.48 | 1.30 | 1.39 | 1.33 | 1.29 | 1.41 | 1.47 | 1.49  | 1.27  | 1.48  | 1.23    |
| Firmicutes     | <i>Bacillus megaterium</i>             | 1.23 | 1.35 | 1.23 | 1.16 | 1.17 | 1.19 | 1.18 | 1.11 | 1.18 | 1.17  | 1.36  | 1.29  | 1.02    |
| Proteobacteria | <i>Salmonella enterica</i>             | 1.15 | 1.13 | 1.16 | 1.12 | 1.18 | 1.20 | 1.12 | 1.22 | 1.14 | 1.03  | 1.10  | 1.25  | 1.00    |
| Bacteroidetes  | <i>Bacteroides vulgatus</i>            | 1.12 | 1.03 | 1.00 | 1.02 | 1.10 | 1.07 | 1.17 | 1.12 | 1.02 | 1.05  | 1.11  | 1.14  | 1.18    |
| Firmicutes     | <i>Thermosinus carboxydivorans</i>     | 1.08 | 0.98 | 1.23 | 1.25 | 1.12 | 1.19 | 1.16 | 1.08 | 1.22 | 1.28  | 1.08  | 1.10  | 1.02    |
| Bacteroidetes  | <i>Bacteroides fragilis</i>            | 1.06 | 0.98 | 1.02 | 0.95 | 0.87 | 0.93 | 0.99 | 0.91 | 0.89 | 1.02  | 1.01  | 0.84  | 1.08    |

**Supplementary Table 2. List of bacterial species identified based on contig based analysis. Percent abundance are shown here. Only above 1% are mentioned and sorted on Lib1.**

| Phylum        | Species                             | Lib1 | Lib2 | Lib3 | Lib4 | Lib5 | Lib6 | Lib7 | Lib8 | Lib9 | Lib10 | Lib11 | Lib12 | Lib-all |
|---------------|-------------------------------------|------|------|------|------|------|------|------|------|------|-------|-------|-------|---------|
| Firmicutes    | <i>Faecalibacterium prausnitzii</i> | 7.26 | 6.31 | 6.15 | 7.29 | 6.91 | 8.02 | 6.22 | 6.67 | 7.25 | 6.32  | 6.84  | 6.96  | 6.41    |
| Bacteroidetes | <i>Bacteroides spp.</i>             | 5.94 | 5.98 | 5.86 | 5.95 | 5.72 | 5.20 | 6.19 | 5.92 | 6.02 | 6.07  | 6.14  | 6.26  | 6.57    |
| Firmicutes    | <i>Ruminococcus spp.</i>            | 3.81 | 4.08 | 4.01 | 4.03 | 4.08 | 3.84 | 2.55 | 4.20 | 4.02 | 3.67  | 3.69  | 4.02  | 3.04    |
| Firmicutes    | <i>Ruminococcus sp. 5_1_39BFAA</i>  | 3.47 | 3.84 | 3.83 | 3.96 | 3.88 | 3.53 | 2.38 | 3.87 | 3.73 | 3.49  | 3.51  | 3.85  | 2.87    |
| Firmicutes    | <i>Coprococcus comes</i>            | 3.05 | 2.69 | 2.76 | 3.05 | 3.27 | 3.09 | 2.03 | 3.12 | 2.69 | 2.97  | 2.79  | 2.76  | 2.22    |
| Bacteroidetes | <i>Bacteroides thetaiotaomicron</i> | 3.00 | 3.10 | 3.47 | 3.02 | 3.49 | 2.97 | 2.91 | 3.45 | 3.33 | 3.15  | 3.63  | 3.06  | 3.30    |
| Bacteroidetes | <i>Bacteroides ovatus</i>           | 2.66 | 2.73 | 2.91 | 2.33 | 2.56 | 2.72 | 2.69 | 2.54 | 2.60 | 2.43  | 2.49  | 2.52  | 2.51    |
| Bacteroidetes | <i>Alistipes putredinis</i>         | 2.65 | 3.10 | 2.70 | 2.92 | 2.64 | 2.13 | 1.14 | 2.52 | 2.52 | 2.71  | 2.52  | 2.96  | 2.75    |
| Firmicutes    | <i>Dorea longicatena</i>            | 2.60 | 2.64 | 2.84 | 2.54 | 2.59 | 2.90 | 2.09 | 2.28 | 2.56 | 2.83  | 2.27  | 2.41  | 2.14    |
| Bacteroidetes | <i>Bacteroides vulgatus</i>         | 2.51 | 2.61 | 2.47 | 2.95 | 3.02 | 2.66 | 1.98 | 3.10 | 2.99 | 2.51  | 3.11  | 2.92  | 3.18    |
| Bacteroidetes | <i>Bacteroides fragilis</i>         | 2.31 | 2.28 | 2.26 | 1.99 | 2.08 | 2.09 | 2.61 | 2.52 | 2.05 | 2.22  | 1.76  | 2.16  | 2.06    |
| Firmicutes    | <i>Eubacterium rectale</i>          | 1.97 | 1.86 | 2.05 | 2.07 | 2.15 | 2.25 | 2.46 | 1.61 | 1.76 | 1.72  | 2.03  | 1.93  | 2.26    |
| Bacteroidetes | <i>Parabacteroides distasonis</i>   | 1.76 | 2.16 | 2.06 | 2.20 | 1.90 | 1.69 | 1.52 | 1.63 | 1.79 | 2.16  | 2.24  | 2.02  | 2.36    |
| Bacteroidetes | <i>Bacteroides helcogenes</i>       | 1.45 | 1.22 | 1.51 | 1.53 | 1.39 | 1.38 | 1.14 | 1.40 | 1.60 | 1.06  | 1.56  | 1.58  | 1.55    |
| Bacteroidetes | <i>Bacteroides stercoris</i>        | 1.42 | 1.22 | 1.39 | 1.17 | 1.24 | 1.28 | 0.96 | 1.33 | 1.23 | 1.06  | 1.31  | 1.27  | 1.45    |
| Bacteroidetes | <i>Bacteroides sp. 3_1_40A</i>      | 1.15 | 1.00 | 0.82 | 1.00 | 0.96 | 0.63 | 0.76 | 1.00 | 1.12 | 0.99  | 0.93  | 1.11  | 1.09    |
| Bacteroidetes | <i>Bacteroides xylanisolvens</i>    | 1.04 | 0.89 | 1.02 | 0.90 | 0.79 | 0.93 | 0.97 | 0.98 | 0.83 | 0.99  | 0.93  | 0.87  | 0.77    |
| Bacteroidetes | <i>Bacteroides sp. 4_3_47FAA</i>    | 1.01 | 0.85 | 0.74 | 0.82 | 1.06 | 0.57 | 0.71 | 1.07 | 0.99 | 0.78  | 0.87  | 1.10  | 1.08    |
| Firmicutes    | <i>Ruminococcus lactaris</i>        | 0.99 | 0.79 | 0.84 | 0.98 | 1.29 | 0.81 | 0.77 | 1.00 | 1.09 | 0.83  | 0.89  | 1.11  | 0.95    |

**Supplementary Table 3. Random sampling of the metatranscriptome sequence reads and de-novo assembly of contigs.**

| <b>Name</b> | <b>Read</b>                    |                           |                                  | <b>Contig</b>                                 |                             |                           |
|-------------|--------------------------------|---------------------------|----------------------------------|-----------------------------------------------|-----------------------------|---------------------------|
|             | <b>Sequences<br/>(million)</b> | <b>Avg. size<br/>(bp)</b> | <b>Total bases<br/>(billion)</b> | <b>% of reads<br/>assembled<br/>in contig</b> | <b>Number<br/>of contig</b> | <b>Avg. size<br/>(bp)</b> |
| HS100       | 30                             | 100                       | 3.0                              | 98.5                                          | 8,253                       | 213                       |
| MS151       | 30                             | 144                       | 4.3                              | 98.9                                          | 42,153                      | 200                       |
| MS301       | 30                             | 178                       | 5.4                              | 98.3                                          | 97,631                      | 313                       |

**Supplementary Table 4: Percent abundance of bacterial species in metatranscriptome data based on read and contig analysis.**

| Phylum        | Species                             | HS100 |        | MS151 |        | MS301 |        |
|---------------|-------------------------------------|-------|--------|-------|--------|-------|--------|
|               |                                     | Read  | Contig | Read  | Contig | Read  | Contig |
| Firmicutes    | <i>Faecalibacterium prausnitzii</i> | 9.6   | 10.1   | 6.5   | 7.1    | 9.2   | 8.4    |
| Bacteroidetes | <i>Bacteroides</i> spp.             | 4.4   | 3.9    | 6.3   | 5.0    | 3.5   | 4.7    |
| Bacteroidetes | <i>Alistipes putredinis</i>         | 2.8   | 3.8    | 2.8   | 2.1    | 2.2   | 3.2    |
| Bacteroidetes | <i>Bacteroides thetaiotaomicron</i> | 2.0   | 2.7    | 3.2   | 2.4    | 1.8   | 2.7    |
| Firmicutes    | <i>Ruminococcus</i> spp.            | 2.7   | 4.4    | 3.4   | 3.0    | 2.1   | 2.5    |
| Firmicutes    | <i>Ruminococcus</i> sp. 5_1_39BFAA  | 2.6   | 4.2    | 3.2   | 2.9    | 2.1   | 2.4    |
| Bacteroidetes | <i>Bacteroides vulgatus</i>         | 1.9   | 1.5    | 3.2   | 2.1    | 1.5   | 2.1    |
| Firmicutes    | <i>Dorea longicatena</i>            | 2.4   | 4.2    | 2.3   | 2.5    | 2.2   | 2.1    |
| Firmicutes    | <i>Coprococcus comes</i>            | 2.4   | 3.2    | 2.3   | 2.4    | 1.9   | 2.0    |
| Firmicutes    | <i>Eubacterium rectale</i>          | 1.3   | 2.0    | 2.2   | 1.6    | 1.3   | 2.0    |



**Supplementary Table 5.** List of accession numbers.

| MG-RAST ID |           |
|------------|-----------|
| 4589721.3  | 4681268.3 |
| 4589651.3  | 4681258.3 |
| 4589652.3  | 4681259.3 |
| 4594249.3  | 4681265.3 |
| 4594250.3  | 4681262.3 |
| 4594251.3  | 4681264.3 |
| 4594252.3  | 4681267.3 |
| 4594253.3  | 4681269.3 |
| 4594254.3  | 4681263.3 |
| 4589650.3  | 4681260.3 |
| 4589719.3  | 4681266.3 |
| 4589720.3  | 4681261.3 |
| 4637936.3  | 4681253.3 |
| 4589649.3  | 4681394.3 |
| 4671852.3  | 4671851.3 |
| 4681530.3  | 4638983.3 |
| 4681257.3  | 4681249.3 |
| 4681435.3  | 4681250.3 |
| 4681436.3  | 4681251.3 |

**Supplementary Table 6. List of bacterial species/sequences identified in the metatranscriptomics data.**

| <b>Sno</b> | <b>Firmicutes</b>            | <b>% Abundance</b> |
|------------|------------------------------|--------------------|
| 1          | Clostridium sp. RKD          | 0.0027             |
| 2          | Thermoanaerobacter uzonensis | 0.0014             |
| 3          | Bacillus sp. F5              | 0.0014             |
| 4          | Streptococcus sp. F.MI.5     | 0.0014             |
| 5          | Streptococcus parauberis     | 0.0014             |

| <b>Sno</b> | <b>Bacteroidetes</b>        | <b>% Abundance</b> |
|------------|-----------------------------|--------------------|
| 1          | Flexibacter elegans         | 0.0014             |
| 2          | Porphyromonas cangingivalis | 0.0014             |
| 3          | Porphyromonas levii         | 0.0014             |

| <b>Sno</b> | <b>Actinobacteria</b>                   | <b>% Abundance</b> |
|------------|-----------------------------------------|--------------------|
| 1          | uncultured actinobacterium HF0500_35G12 | 0.0233             |
| 2          | Streptomyces cinnamonensis              | 0.0014             |

| <b>Sno</b> | <b>Verrucomicrobia</b>                               | <b>% Abundance</b> |
|------------|------------------------------------------------------|--------------------|
| 1          | uncultured Verrucomicrobiales bacterium HF0200_39L05 | 0.0014             |

| <b>Sno</b> | <b>Proteobacteria</b>                                | <b>% Abundance</b> |
|------------|------------------------------------------------------|--------------------|
| 1          | Morganella morganii                                  | 0.0014             |
| 2          | Pseudomonas denitrificans                            | 0.0014             |
| 3          | Pseudomonas oleovorans                               | 0.0014             |
| 4          | Pseudomonas sp. AW54a                                | 0.0014             |
| 5          | Pseudomonas sp. CT14                                 | 0.0014             |
| 6          | Pseudomonas sp. ED23-33                              | 0.0014             |
| 7          | Pseudomonas sp. K-62                                 | 0.0027             |
| 8          | Pseudomonas sp. K82                                  | 0.0014             |
| 9          | Rickettsia akari                                     | 0.0014             |
| 10         | Roseovarius nubinhibens                              | 0.0069             |
| 11         | Xanthomonas sp. W17                                  | 0.0014             |
| 12         | Yersinia aldovae                                     | 0.0014             |
| 13         | uncultured alpha proteobacterium HF0070_14E07        | 0.0041             |
| 14         | uncultured alpha proteobacterium HF0130_06E21        | 0.0014             |
| 15         | uncultured beta proteobacterium CBNPD1 BAC clone 578 | 0.0137             |
| 16         | uncultured beta proteobacterium HF0010_04H24         | 0.0014             |
| 17         | uncultured delta proteobacterium HF0200_14D13        | 0.0082             |
| 18         | uncultured delta proteobacterium HF0200_19J16        | 0.0014             |
| 19         | uncultured delta proteobacterium HF0200_39N20        | 0.0178             |
| 20         | uncultured delta proteobacterium HF0770_45N15        | 0.0014             |
| 21         | uncultured gamma proteobacterium EB750_07C09         | 0.0027             |
| 22         | uncultured gamma proteobacterium HF0010_10D20        | 0.0014             |
| 23         | uncultured Pseudomonadales bacterium HF0010_05E14    | 0.0014             |
| 24         | uncultured Rhizobiales bacterium HF4000_32B18        | 0.0027             |
| 25         | uncultured Rhodospirillales bacterium HF4000_24M03   | 0.0014             |

Supplementary Table 7. List of genes (Level 4 function) identified in MT dataset.

|                                                                                     |
|-------------------------------------------------------------------------------------|
| NEFL, NF-L; neurofilament light polypeptide                                         |
| ACADM, acd; acyl-CoA dehydrogenase [EC:1.3.8.7]                                     |
| cysI; sulfite reductase (NADPH) hemoprotein beta-component [EC:1.8.1.2]             |
| cysJ; sulfite reductase (NADPH) flavoprotein alpha-component [EC:1.8.1.2]           |
| cobC1, cobC; cobalamin biosynthetic protein CobC                                    |
| GCDH, gcdH; glutaryl-CoA dehydrogenase [EC:1.3.8.6]                                 |
| E1.4.1.9; leucine dehydrogenase [EC:1.4.1.9]                                        |
| abmG; 2-aminobenzoate-CoA ligase [EC:6.2.1.32]                                      |
| pdeA; c-di-GMP-specific phosphodiesterase [EC:3.1.4.52]                             |
| CTSL; cathepsin L [EC:3.4.22.15]                                                    |
| ARPC2; actin related protein 2/3 complex, subunit 2                                 |
| IsrD; AI-2 transport system permease protein                                        |
| COX15; cytochrome c oxidase assembly protein subunit 15                             |
| ttrC; tetrathionate reductase subunit C                                             |
| desR; two-component system, NarL family, response regulator DesR                    |
| mprB; two-component system, OmpR family, sensor histidine kinase MprB [EC:2.7.13.3] |
| virB10, lvhB10; type IV secretion system protein VirB10                             |
| phoD; alkaline phosphatase D [EC:3.1.3.1]                                           |
| ABC.NGC.P1; N-acetylglucosamine transport system permease protein                   |
| CYTB, petB; ubiquinol-cytochrome c reductase cytochrome b subunit                   |
| virB1; type IV secretion system protein VirB1                                       |
| rpoA2; DNA-directed RNA polymerase subunit A" [EC:2.7.7.6]                          |
| EIF5; translation initiation factor 5                                               |
| EEF1A; elongation factor 1-alpha                                                    |
| poxA; lysyl-tRNA synthetase, class II [EC:6.1.1.6]                                  |
| SRRM1, SRM160; serine/arginine repetitive matrix protein 1                          |
| E3.1.11.1, sbcB; exodeoxyribonuclease I [EC:3.1.11.1]                               |
| E3.4.15.1, ACE; peptidyl-dipeptidase A [EC:3.4.15.1]                                |
| ligJ; 4-oxalmesaconate hydratase [EC:4.2.1.83]                                      |
| E1.8.2.1; sulfite dehydrogenase [EC:1.8.2.1]                                        |
| HGD, hmgA; homogentisate 1,2-dioxygenase [EC:1.13.11.5]                             |
| agp; glucose-1-phosphatase [EC:3.1.3.10]                                            |
| ligB; protocatechuate 4,5-dioxygenase, beta chain [EC:1.13.11.8]                    |
| E6.4.1.4A; 3-methylcrotonyl-CoA carboxylase alpha subunit [EC:6.4.1.4]              |
| E3.1.1.17; gluconolactonase [EC:3.1.1.17]                                           |
| E3.1.1.75, phaZ; poly(3-hydroxybutyrate) depolymerase [EC:3.1.1.75]                 |
| ubiH; 2-octaprenyl-6-methoxyphenol hydroxylase [EC:1.14.13.-]                       |
| PCCB, pccB; propionyl-CoA carboxylase beta chain [EC:6.4.1.3] - #1                  |
| E1.1.1.36, phbB; acetoacetyl-CoA reductase [EC:1.1.1.36]                            |
| atuG; citronellol/citronellal dehydrogenase                                         |
| SCD, desC; stearyl-CoA desaturase (delta-9 desaturase) [EC:1.14.19.1]               |

|                                                                                                                |
|----------------------------------------------------------------------------------------------------------------|
| ligA; protocatechuate 4,5-dioxygenase, alpha chain [EC:1.13.11.8]                                              |
| E5.1.1.8; 4-hydroxyproline epimerase [EC:5.1.1.8]                                                              |
| pduL; phosphotransacylase                                                                                      |
| mtnD, mtnZ, ADI1; 1,2-dihydroxy-3-keto-5-methylthiopentene dioxygenase [EC:1.13.11.53 1.13.11.54]              |
| hcaC, bphF; dioxygenase ferredoxin subunit                                                                     |
| cbiGH-cobJ; cobalt-precorrin 5A hydrolase / precorrin-3B C17-methyltransferase [EC:3.7.1.12 2.1.1.131]         |
| ppx-gppA; exopolyphosphatase / guanosine-5'-triphosphate,3'-diphosphate pyrophosphatase [EC:3.6.1.11 3.6.1.40] |
| acnB; aconitate hydratase 2 / 2-methylisocitrate dehydratase [EC:4.2.1.3 4.2.1.99]                             |
| hpaE, hpcC; 5-carboxymethyl-2-hydroxyruconic-semialdehyde dehydrogenase [EC:1.2.1.60]                          |
| ligC; 2-hydroxy-4-carboxymuconate semialdehyde hemiacetal dehydrogenase [EC:1.1.1.312]                         |
| phhA, PAH; phenylalanine-4-hydroxylase [EC:1.14.16.1]                                                          |
| ACTA2; actin, aortic smooth muscle                                                                             |
